# Supplementary material for: Women’s satisfaction with existing labour and delivery services in Ethiopia: a systematic review and meta-analysis
Source: PubMed Central journal article supplement — BMJ Open. 2020 Jul 23;10(7):e036552. doi: 10.1136/bmjopen-2019-036552 (PMC7380852; doi:10.1136/bmjopen-2019-036552), 2020-07-23
Supplement: bmjopen-2019-036552.draft_revisions.pdf [file bmjopen-2019-036552.draft_revisions.pdf]

# BMJ Open

BMJ Open is committed to open peer review. As part of this commitment we make the peer review history of every article we publish publicly available.

When an article is published we post the peer reviewers' comments and the authors' responses online. We also post the versions of the paper that were used during peer review. These are the versions that the peer review comments apply to.

The versions of the paper that follow are the versions that were submitted during the peer review process. They are not the versions of record or the final published versions. They should not be cited or distributed as the published version of this manuscript.

BMJ Open is an open access journal and the full, final, typeset and author-corrected version of record of the manuscript is available on our site with no access controls, subscription charges or pay-per-view fees (<http://bmjopen.bmj.com>).

If you have any questions on BMJ Open's open peer review process please email [info.bmjopen@bmj.com](mailto:info.bmjopen@bmj.com)

# BMJ Open

## Women's satisfaction with existing labor and delivery services in Ethiopia: a systematic review and meta-analysis

|                               |                                                                                                                                                                                                                                                                                                              |
|-------------------------------|--------------------------------------------------------------------------------------------------------------------------------------------------------------------------------------------------------------------------------------------------------------------------------------------------------------|
| Journal:                      | <i>BMJ Open</i>                                                                                                                                                                                                                                                                                              |
| Manuscript ID                 | bmjopen-2019-036552                                                                                                                                                                                                                                                                                          |
| Article Type:                 | Original research                                                                                                                                                                                                                                                                                            |
| Date Submitted by the Author: | 20-Dec-2019                                                                                                                                                                                                                                                                                                  |
| Complete List of Authors:     | Demis, Asmamaw; Woldia University, Nursing<br>Getie, Addisu; Woldia University, Nursing<br>Wondmieneh, Adam; Woldia University, Nursing<br>Bimerew, Melaku; Woldia University, Nursing<br>Alemnew, Birhan; Woldia University, Medical Laboratory sciences ;<br>Gedefaw, Getnet; Woldia University, Midwifery |
| Keywords:                     | Maternal medicine < OBSTETRICS, PUBLIC HEALTH, EPIDEMIOLOGY                                                                                                                                                                                                                                                  |
|                               |                                                                                                                                                                                                                                                                                                              |

SCHOLARONE™  
Manuscripts

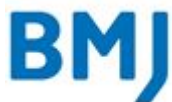

I, the Submitting Author has the right to grant and does grant on behalf of all authors of the Work (as defined in the below author licence), an exclusive licence and/or a non-exclusive licence for contributions from authors who are: i) UK Crown employees; ii) where BMJ has agreed a CC-BY licence shall apply, and/or iii) in accordance with the terms applicable for US Federal Government officers or employees acting as part of their official duties; on a worldwide, perpetual, irrevocable, royalty-free basis to BMJ Publishing Group Ltd ("BMJ") its licensees and where the relevant Journal is co-owned by BMJ to the co-owners of the Journal, to publish the Work in this journal and any other BMJ products and to exploit all rights, as set out in our [licence](#).

The Submitting Author accepts and understands that any supply made under these terms is made by BMJ to the Submitting Author unless you are acting as an employee on behalf of your employer or a postgraduate student of an affiliated institution which is paying any applicable article publishing charge ("APC") for Open Access articles. Where the Submitting Author wishes to make the Work available on an Open Access basis (and intends to pay the relevant APC), the terms of reuse of such Open Access shall be governed by a Creative Commons licence – details of these licences and which [Creative Commons](#) licence will apply to this Work are set out in our licence referred to above.

Other than as permitted in any relevant BMJ Author's Self Archiving Policies, I confirm this Work has not been accepted for publication elsewhere, is not being considered for publication elsewhere and does not duplicate material already published. I confirm all authors consent to publication of this Work and authorise the granting of this licence.

1  
2  
3  
4  
5  
6  
7  
8  
9  
10  
11  
12  
13  
14  
15  
16  
17  
18  
19  
20  
21  
22  
23  
24  
25  
26  
27  
28  
29  
30  
31  
32  
33  
34  
35  
36  
37  
38  
39  
40  
41  
42  
43  
44  
45  
46  
47  
48  
49  
50  
51  
52  
53

## **Women's satisfaction with existing labor and delivery services in Ethiopia: a systematic review and meta-analysis**

Asmamaw Demis<sup>1</sup>, Addisu Getie<sup>1</sup>, Adam Wondmieneh<sup>1</sup>, Melaku Bimerew<sup>1</sup>, Birhan Alemnew<sup>2</sup>, Getnet Gedefaw<sup>3\*</sup>

<sup>1</sup>Department of Nursing, College of Health Sciences, Woldia University, Woldia, Ethiopia

<sup>2</sup>Department of Medical Laboratory Sciences, College of Health Sciences, Woldia University, Woldia, Ethiopia

<sup>3</sup>Department of Midwifery, College of Health Sciences, Woldia University, Woldia, Ethiopia

**\*Corresponding author:** Getnet Gedefaw

Department of Midwifery, College of Health Sciences, Woldia University, Woldia, Ethiopia

Email: gedefawget@gmail.com

Phone number: +251918136879

P.O.Box : 400

54  
55  
56  
57  
58  
59  
60

## **Abstract**

1  
2  
3  
4 **Objective:** To estimate the pooled prevalence of maternal satisfaction with existing  
5 labor and delivery services in Ethiopia.

6 **Design:** Systematic review and meta-analysis.

7  
8 **Methods:** MEDLINE/Pub Med, Scopus, Hinari, Google scholar, and web of science  
9 electronic databases and grey literature from repository were searched for all the  
10 available references. This systematic review included **19** cross-sectional studies.  
11 Subgroup analysis was conducted for the evidence of heterogeneity. Cochrane I<sup>2</sup>  
12 statistics were used to check the heterogeneity of the studies. Egger and Biggs test with  
13 funnel plots were used to investigate publication bias. This meta-analysis was performed  
14 using a weighted inverse variance random-effects model.  
15  
16  
17  
18

19 **Result:** Nineteen studies were included in the systematic review and meta-analysis. The  
20 pooled prevalence of the level of women's satisfaction with existing labor and delivery  
21 services in Ethiopia was 70.64% (95% CI: 61.04, 80.24). Having informal education of the  
22 women (AOR:2.16,95%CI:1.98, 2.36), time to be seen by the health care providers within  
23 20 minutes(AOR:3.03,95%CI:2.77,3.32), receiving free service (AOR:4.89,95%CI:2.64, 9.08),  
24 keeping women privacy (AOR:2.77,95%CI:1.3, 5.88), planned delivery in the health  
25 institution (AOR:2.85,95%CI:2.64, 3.07), duration of labor within 12 hours  
26 (AOR:2.7,95%CI:1.88, 3.88), and haven't antenatal care follow up (AOR:4.03,95%CI:3.26,  
27 4.98), were associated factors for women satisfaction with existing labor and delivery  
28 services.  
29  
30  
31  
32  
33

34 **Conclusion:** The pooled prevalence of women's satisfaction with labor and delivery  
35 services was higher. Informal educational status of the women, Not having antenatal  
36 care follow up, planned delivery in the health institution, keeping women privacy,  
37 getting free service, time to be seen by the health care providers within 20 minutes and  
38 duration of labor within 12 hours were the associated factors of women's satisfaction  
39 with labor and delivery services. This finding is important to design strategic policies and  
40 to prevent emergency neonatal and women complications during the intrapartum and  
41 postpartum periods.  
42  
43  
44  
45  
46

47 **Keywords:** Women satisfaction, delivery, systematic review, and meta-analysis  
48  
49  
50  
51  
52  
53  
54  
55

### Strength and limitation of the study

- ✓ The strength of this study is including wide geographical areas, different eligible articles across the country setting increases the accuracy of the finding.
- ✓ This systematic review and meta-analysis review provided an overall prevalence of maternal satisfaction with the existing labor and delivery services in Ethiopia.
- ✓ This systematic review and meta-analysis result reporting was stick on to the Preferred Reporting Items for Systematic Reviews and Meta-Analyses (PRISMA) guidelines
- ✓ Declaring the absence of publication bias by computing trim and fill analysis increase the reliability of the findings.
- ✓ All included studies in this systematic review and meta-analysis were cross-sectional studies, which may limit the opportunity to generate a causal link between variables.

## Introduction

Labor and delivery is a critically dangerous time for women and newborns. The World Health Organization reported that approximately more than eight hundred fifty women die from preventable causes related to childbirth every day, with 99% of all these maternal deaths occurring in low and middle-income countries, the majority of which are in sub-Saharan Africa (162,000) and Southern Asia (83, 000) (1). Women's satisfaction with labor and delivery service is an important factor for the choice of health facility; comply with service provided and follow-ups and its future utilization for labor and delivery services (2-6).

Even though the primary target of the Sustainable Development Goal (SDG) is to reduce the global maternal mortality rate to less than 70 per 100,000 live births, the quality of labor and delivery services in most low and middle-income countries was poor which had been identified as one of the precursors to the unacceptably high maternal mortality rate (7). Ethiopia is still struggling to reduce the maternal mortality rate in the country which stands at 412 deaths for every 100,000 live births, which is very far from the international target (8, 9).

Identifying the factors that affect women's satisfaction with labor and delivery services is important for health care providers to continuously improve the quality of labor and delivery services. Women's satisfaction with labor and delivery services can be affected by numerous factors including waiting time and availability of basic drugs, physical environment of the health care facility (cleanliness of the environment, delivery room, and wards), cost paid to service and waiting area, privacy, lack of consideration for cultural practices and beliefs and health providers' technical competency (10-14). Only,

1  
2  
3 provision of maternal health service does not improve maternal health, as a result,  
4 World Health Organization promotes skilled attendance at every birth to reduce  
5 maternal mortality and recommends that women's satisfaction is the most important  
6 index to improve the quality and effectiveness of health care provision (15).  
7  
8  
9  
10

11  
12  
13 Currently, most patients in low and middle-income countries and specifically in Ethiopia  
14 complain about hospital services, of which labor and delivery services is the primary one.  
15 Although studies have been conducted to assess women's satisfaction with labor and  
16 delivery services in Ethiopia, they were conducted in a specific institution with a small  
17 sample size and their findings were inconclusive and inconsistent. Similarly, the level of  
18 women's satisfaction with labor and delivery services nationally remains unknown yet.  
19 Therefore, the objective of this systematic review and meta-analysis was to estimate the  
20 level of women's satisfaction with labor and delivery services at the national level and  
21 identify factors associated with women's satisfaction with delivery services. The findings  
22 of this study will be very important to monitor and improve the quality of labor and  
23 delivery services and to inform stakeholders from government and nongovernmental  
24 organizations (NGOs) and policymakers for areas of improvement in the health care  
25 system of the country to reduce maternal mortality and morbidity related to  
26 complications of pregnancy, labor, and delivery.  
27  
28  
29  
30  
31  
32  
33  
34  
35  
36  
37  
38  
39  
40  
41

42 Women's satisfaction with labor and delivery service is a key determinant of quality of  
43 care and an important component in measuring performance. Nowadays, satisfaction  
44 had been identified as the major index to assess the quality of health care provision in  
45 low and middle-income countries. Therefore, this systematic review and meta-analysis  
46 aimed to assess the levels of women's satisfaction with labor and delivery services in  
47 Ethiopia.  
48  
49  
50  
51  
52  
53  
54  
55



## Methods

### Study design and Setting

This systematic review and meta-analysis were conducted to assess the pooled prevalence of women's satisfaction towards labor and delivery services and its associated factors in Ethiopia, 2019.

### Search Strategies

Studies were searched from databases MEDLINE/PubMed, Scopus, Hinari, Google scholar, and web of science electronic databases and grey literature from the repository. Additionally, bibliographies of identified articles from MEDNAR, World Wide Science Maternity and Infant Care and Wiley Online Library were searched. Moreover, missing data were handled by contacting corresponding authors. Search terms were formulating from PICO questions on the above-mentioned databases and comprehensive search strategy had been developed using different Boolean operators.

The following search terms were used: Satisfaction AND "Delivery Services" OR "Delivery care services" OR "Skilled delivery services" OR "Institutional delivery services" OR "Labor" OR "Labor and Delivery services" OR "Labor and Delivery care" OR "Labor and Delivery care services" OR "Intrapartum care" OR "Childbirth care" OR "Childbirth care services" AND "Mother's" OR "Women" OR "Clients" AND "Associated factors" AND Ethiopia and related terms. All articles searched from databases were exported to the EndNote library and initially screened by title and abstract. The full text of those articles satisfying inclusion criteria by title and abstract was reviewed the full articles. Systematic review with narrative synthesis was used to summarize the findings of articles in Ethiopia. Quantitative meta-analysis was considered for the homogeneous articles.

### Eligibility Criteria

#### Inclusion criteria

1  
2  
3 **Population:** only studies involving women who gave birth in public and private  
4 institutions  
5

6  
7 **Study design:** observational studies such as cross-sectional, case-control, and  
8 retrospective and prospective cohort studies and national survey and surveillance  
9 reports.  
10  
11

12  
13 **Study area:** only studies conducted in Ethiopia without time limiting and reported the  
14 prevalence or at least one least adjusted associated factors of women's satisfaction  
15 towards labor and delivery services.  
16  
17

18  
19 **Publication status and language:** Both published and unpublished reported articles in  
20 English language were considered.  
21  
22

### 23 **Exclusion criteria**

24 Citations without abstracts and/or full-text, commentaries, anonymous reports, letters,  
25 editorials and articles not reporting our outcome of interest were excluded after  
26 reviewing the full texts.  
27  
28

### 29 **Outcome variables**

30  
31 This systematic review and meta-analysis have two essential outcomes. The first  
32 outcome of this study mainly focused on the level of women's satisfaction towards labor  
33 and delivery services. The second outcome of the study was factors affecting satisfaction  
34 of women towards labor and delivery services which were measured by maternal  
35 educational status, accessing free service, duration of labor, time to be seen by health  
36 care providers, keeping women privacy, planned pregnancy and attending antenatal  
37 care follow up (yes/no), were the main contributing factors for women satisfaction with  
38 labor and delivery services.  
39  
40  
41  
42  
43  
44  
45  
46  
47  
48  
49

### 50 **Data extraction**

51 First, all studies obtained from all databases were exported to Endnote version X8  
52 software to remove duplicates. Secondly, all studies were exported to Microsoft Excel  
53  
54  
55

1  
2  
3 spreadsheet. Two authors (AD and GG) independently extracted all the important data  
4 using a standardized data extraction form which was adapted from the JBI data  
5 extraction format. Substantial agreement between reviewers i.e. Cohen's kappa  
6 coefficient  $>0.60$  was accepted and resolved through discussion and consensus. For the  
7 first outcome (prevalence) the data extraction format included (primary author, year of  
8 publication, regions, study area, sample size, and prevalence with 95%CI). For the  
9 second outcome (associated factors) data were extracted with 2 by 2 table format and  
10 then the log odds ratio for each factor was calculated.  
11  
12  
13  
14  
15  
16  
17  
18

### 19 **Quality assessment**

20  
21 Two authors (AD & GG) independently assessed the quality of each studies using  
22 Newcastle-Ottawa-scale (NOS) for cross-sectional studies (16). All Articles underwent  
23 systematic review and meta-analysis is cross-sectional studies. The methodological  
24 quality of the study, comparability of the study and the outcome and statistical analysis  
25 of the study were the three major assessment tools that we used to declare the quality  
26 of the study. Last, studies scored a scale of  $\geq 7$  out of 10 was considered as achieving  
27 high quality. Two authors (AD and GG) independently assessed the quality of each  
28 original study using the quality assessment tool. During quality appraisal of the articles,  
29 any discrepancies between the two authors were resolved by taking the second group  
30 authors (AW, AG, MB, and BA). All of the studies were included based on the Newcastle  
31 –Ottawa Scale quality assessment criteria.  
32  
33  
34  
35  
36  
37  
38  
39  
40  
41  
42  
43  
44

### 45 **Data processing and analysis**

46  
47 Random effect model was applied to estimate the pooled prevalence of women's  
48 satisfaction towards labor and delivery services. After extraction of the articles in  
49 Microsoft Excel spreadsheet format, the analysis was carried out using STATA version 14  
50 statistical software. Cochran Q-test and  $I^2$  statistics were computed to assess  
51  
52  
53  
54  
55  
56  
57  
58  
59  
60

1  
2  
3 heterogeneity among studies (17). After computing the statistics, results showed there is  
4 significant heterogeneity among studies ( $I^2 = 99.3\%$ ,  $p < 0.001$ ). To estimate the overall  
5 prevalence of having good knowledge of the postnatal women, via back-transform of  
6 the weighted mean of the transformed proportions arcsine variance weights and  
7 Dersimonian-Laird weights for fixed-effects model and random effect model  
8 respectively (18). Publication bias was assessed using Egger's and Begg's test. Subgroup  
9 analysis was done based on the study setting (study setting (region), year of study and  
10 sample size to minimize the random variations between the point estimates of the  
11 primary study. Trim and Fill analysis using Duval and Tweedie were implemented [38].  
12 Forest plot format was used to present the pooled point prevalence with 95%CI. For  
13 associations, a log odds ratio was used to decide the association between associated  
14 factors and satisfaction of women towards delivery services in the included studies  
15  
16  
17  
18  
19  
20  
21  
22  
23  
24  
25  
26

## 27 **Results**

### 28 **Characteristics of the included studies**

29  
30  
31  
32  
33 524 articles were retrieved using a search strategy regarding women satisfaction  
34 towards labor and delivery and associated factors in Ethiopia at MEDLINE/Pub Med,  
35 Google Scholar, Scopus, Hinari, MEDNAR, World Wide Science, Maternity and Infant  
36 Care and Wiley Online Library, a web of science and other gray and unpublished  
37 literature. After duplication is removed, 324 studies were remaining.  
38  
39

40  
41 Out of the remaining 324 articles, 248 articles were excluded after review of their titles  
42 and abstracts. Therefore, 76 full-text articles were accessed and assessed for inclusion  
43 criteria, which resulted in the further exclusion of 57 articles primarily due to reasons. As  
44 a result, 19 studies were fulfilled the inclusion criteria to undergo the final systematic  
45 review and meta-analysis (Figure 1). This systematic review and meta-analysis consist of  
46 nineteen cross-sectional studies with their sample size and prevalence (Table 1).  
47  
48  
49  
50  
51  
52  
53  
54  
55

Table 1: Study characteristics included in the systematic review and meta-analysis

| Authors            | Region      | Study area          | Study design    | Sample size | Prevalence | Quality  |
|--------------------|-------------|---------------------|-----------------|-------------|------------|----------|
| Gizew Asres[19]    | Amhara      | Bure                | cross sectional | 420         | 88.095     | Low risk |
| Getenet et al[20]  | Harari      | Harar               | cross sectional | 398         | 84.673     | Low risk |
| Temamo et al[21]   | SNNPR       | Wolaita             | cross sectional | 736         | 95         | Low risk |
| Edaso et al[22]    | Oromia      | West Arsi           | cross sectional | 477         | 74.6       | Low risk |
| Gashaye et al[23]  | Amhara      | Gondar              | cross sectional | 579         | 31.3       | Low risk |
| Yarinbab et al[24] | SNNPR       | Mizan               | cross sectional | 280         | 30.4       | Low risk |
| Demas et al[25]    | Addis Ababa | Addis Ababa         | cross sectional | 394         | 19.00      | Low risk |
| Bitew et al[26]    | Amhara      | Debre Markos        | cross sectional | 398         | 81.7       | Low risk |
| Kidane et al[27]   | Harari      | Harar               | cross sectional | 400         | 80         | Low risk |
| Melese et al[28]   | Addis Ababa | Addis Ababa         | cross sectional | 423         | 92.9       | Low risk |
| Gonie et al[29]    | Oromia      | Jimma               | cross sectional | 366         | 78.7       | Low risk |
| Tayelign et al[30] | Amhara      | Dessie and Bahirdar | cross sectional | 417         | 61.9       | Low risk |
| Dewana et al[31]   | SNNPR       | Arbaminch           | cross sectional | 256         | 90.2       | Low risk |



## Subgroup analysis

Subgroup analysis was conducted with the evidence of heterogeneity. Therefore, the Cochran  $I^2$  statistic =74.5%,  $P<0.001$ ) with the evidence of moderate heterogeneity. Therefore subgroup analysis was done by study year, sample size and study area. Based on the subgroup analysis, the level of women's satisfaction with labor and delivery services was highest in Harari region 82.58% whereas 84.5 % in the study conducted within the year 2006-2010(Table 2).

Table 2: Subgroup analysis on the level of women satisfaction with labor and delivery services in Ethiopia, 2019 (n = 19)

| Variables   | Subgroup    | No. of studies | Prevalence (95%CI) | $I^2$ (%) | P-value |
|-------------|-------------|----------------|--------------------|-----------|---------|
| Sample size | ≥400        | 10             | 68.99(55.49-82.47) | 99.2      | <0.001  |
|             | <400        | 9              | 70.51(53.68-87.34) | 99.5      | <0.001  |
| Study area  | Addis Ababa | 3              | 64.65(22.42-96.88) | 99.8      | <0.001  |
|             | Oromia      | 4              | 74.89(68.59-81.2)  | 89.1      | 0.838   |
|             | Amhara      | 6              | 64.84(47.04-82.64) | 99.2      | <0.001  |
|             | Harari      | 2              | 82.47(77.84-86.99) | 66.8      | <0.001  |
|             | SNNPR       | 4              | 73.79(51.94-95.65) | 99.4      | <0.001  |
| Study year  | 2006-2010   | 2              | 84.5(73.23-95.77)  | 99.7      | <0.001  |
|             | 2011-2015   | 8              | 74.9(69.5-80.23)   | 99.2      | <0.001  |
|             | 2016-2019   | 9              | 62.37(43.6-81.13)  | 99.3      | <0.001  |

### **Associated factors for women satisfaction with labor and delivery services**

In this systematic review and meta-analysis; duration of labor, free service, keeping privacy, time to be seen by health care provider <20minute, planned delivery in the health institution, antenatal care, and maternal education were the factors associated with women satisfaction with labor and delivery services.

Women who hadn't formal education (AOR = 2.16; 95% CI: 1.98- 2.36) 2.16 times more likely to be satisfied by labor and delivery services than women who had formal education (Fig.4)

The odds of having antenatal care (AOR = 4.03; 95% CI: 3.26- 4.98), had a low level of satisfaction by the labor and delivery services (Fig.5).

In this study women who had planned pregnancy (AOR = 2.85; 95% CI: 2.64- 3.07), were 2.85 times more likely to be satisfied by labor and delivery services than their counterparts (Fig.6).

Women who have seen by the health care provider within 20 minutes (AOR = 3.03; 95% CI: 2.77- 3.32), were 3.03 times more likely satisfied by the labor and delivery services than the counterparts (Fig.7).

Women whose privacy kept (AOR = 2.77; 95% CI: 1.3- 5.88), were 2.77 times more likely to be satisfied by the labor and delivery services than their counterparts (Fig.8).

The odds of not staying more than 12 hours to give birth (AOR = 2.7; 95% CI: 1.88- 3.88), had high level of satisfaction by the labor and delivery services (Fig.9).

Women who received free service (AOR = 4.89; 95% CI: 2.64- 9.08), were 4.89 times more likely to be satisfied by labor and delivery services than women who got their service with cost expense (Fig.10).



## Discussion

Globally critical maternity and infant care is implementing efforts are to reduce maternal mortality has been stepped up, maternal satisfaction with the existing labor and delivery services needs to be addressed by the low and middle-income countries. Quality improvement efforts in low and middle-income countries could focus on strengthening the process of labor and delivery care. In this systematic review and meta-analysis, the pooled level of women's satisfaction with labor and delivery services in Ethiopia was 70.64% (95% CI: 61.04–80.21).

The finding of this review is in line with the study done in India [39], and Egypt [40]. This similarity report might be due to labor and delivery services given in low and middle-income countries that are nearly similar due to the limited number of health institutions, health professionals and the availability of drugs.

The finding of this systematic review and meta-analysis is lower than the study conducted in Senegal [41], and Nepal [42]. This discrepancy might be due to this study reports a review result from many institutions whereas studies reported in Senegal and Nepal are from a single institution.

Being able to maintain privacy is an important associated factor for women's satisfaction with labor and delivery services. This study finding is supported by the study done in India [39], Uganda [44], and report from developing countries [43]. This might be the fact that inadequate privacy during labor and delivery care and counseling was associated with women's poor perception of services.

Women who have been seen by the health care provider within 20 minutes are a key determinant factor for women to be satisfied with the existing labor and delivery services. This finding is consistent with the stud done in Nepal [42]. This might be due to

1  
2  
3 that being treated with dignity, respect, kindness, approachability, and courtesy was a  
4 key interpersonal behavior that enhances women's satisfaction.  
5  
6  
7

8 The absence of antenatal care follow up is the associated risk factors for maternal  
9 satisfaction with labor and delivery care in this systematic review and meta-analysis. The  
10 probable reason might be that the exposure to facilities through antenatal care  
11 increases the understanding of women about the service provided by the  
12 health care professionals. This, in turn, demands enhanced healthcare services and  
13 better-quality labor care in hospitals or health centers.  
14  
15  
16  
17

18  
19 The odds of having planned delivery in the health institution were nearly three times  
20 more likely to be satisfied with the labor and delivery services provided in the institution.  
21 Women who had awareness and knowledge regarding facility delivery and its important  
22 may enhance the utilization and satisfaction of labor and delivery services. Indeed,  
23 clients had various expectations about hospital delivery that influenced their perception  
24 of care.  
25  
26  
27  
28

29 Having informal education of the women were two times more likely to be satisfied with  
30 the existing and provided labor and delivery services in the health institutions. This  
31 finding is parallel with the study conducted in Serbia [45] and Uganda [44]. This might  
32 be explained as women who had higher educational status, may expect high-quality  
33 care of labor and delivery is provided which might be inconsistent due to a limited  
34 number of health care professionals, availability of medications and the number of  
35 equipped health facilities which results in low satisfaction among laboring women.  
36  
37  
38  
39  
40  
41  
42  
43

44 The odds of receiving free service are the associated factor for women's satisfaction with  
45 labor and delivery services. This might be due to providing available and accessible  
46 medications and medical resources with free service settings may significantly increase  
47 their satisfaction.  
48  
49  
50  
51  
52  
53  
54  
55

1  
2  
3 Women whose labor is commenced within 12 hours are 2.7 times more likely to be  
4 satisfied by the labor and delivery services. This might be because women whose labor  
5 persists beyond 12 hours were more prone to privacy breakage due to repeated pelvic  
6 examination, and persistent labor pain which results in dissatisfaction.  
7  
8  
9  
10

## 11 **Conclusion**

12 The pooled prevalence of women's satisfaction with labor and delivery services was  
13 higher. Informal educational status of the women, Not having antenatal care follow up,  
14 planned delivery in the health institution, keeping women privacy, getting free service,  
15 time to be seen by the health care providers within 20 minutes and duration of labor  
16 within 12 hours were the associated factors of women's satisfaction with labor and  
17 delivery services. This finding is important to design strategic policies and to prevent  
18 emergency neonatal and women complications during the intrapartum and postpartum  
19 period  
20  
21  
22  
23  
24  
25  
26  
27  
28  
29

## 30 **List of Abbreviations**

31 AOR: Adjusted Odds Ratio, ANC: Antenatal Care, EDHS: Ethiopia Demographic Health  
32 Survey, MMR: Maternal Mortality Ratio,, WHO: World Health Organization  
33  
34  
35  
36

## 37 **Declarations**

## 38 **Funding**

39 Not applicable  
40  
41  
42

## 43 **Availability of data and materials**

44 All related data has been presented within the manuscript. The dataset supporting the  
45 conclusions of this article is available from the authors on request.  
46  
47  
48

## 49 **Author's Contributions**

50 AD and GG developed the draft protocol under the supervision of AW, AG, MB, and BA.  
51 All authors (AD, GG) critically reviewed, provided substantive feedback and contributed  
52  
53  
54  
55

1  
2  
3 to the intellectual content of this paper and made substantial contributions to the  
4 conception, conceptualization and manuscript preparation of this systematic review. All  
5 authors read and approved the final manuscript.  
6  
7  
8

### 9 **Authors' Information**

10  
11 <sup>1</sup>Department of Nursing, College of Health Sciences, Woldia University, Woldia, Ethiopia,  
12 P.O.Box: 400.  
13

14  
15 <sup>2</sup>Department of Medical Laboratory Sciences, College of Health Sciences, Woldia  
16 University, Woldia, Ethiopia, P.O.Box: 400.  
17

18  
19 <sup>3</sup>Department of Midwifery, College of Health Sciences, Woldia University, Woldia,  
20 Ethiopia, P.O.Box: 400.  
21  
22

### 23 **Ethics approval and consent to participate**

24  
25 Not applicable  
26

### 27 **Consent for publication**

28  
29 Not applicable.  
30

### 31 **Competing interest**

32  
33 The authors declared that they have no competing interests  
34

### 35 **Patient and Public involvement**

36  
37 No patient involved  
38  
39  
40  
41  
42  
43  
44  
45  
46  
47  
48  
49  
50  
51  
52  
53  
54  
55  
56  
57  
58  
59  
60

## References

1. WHO, UNICEF. Trends in maternal mortality and morbidity, 1990-2010, WHO, UNICEF, UNFPA and The World Bank estimates. 2012.
2. Paudel, Y. R., Aryal, K., Mehata, S., Paudel, D., Poudel, P., King, S., Dariang, M. and Barnett, S. Women's satisfaction of maternity care in Nepal and its correlation with intended future utilization. *International Journal of Reproductive Medicine*, 2015.
3. Rao KD, Peters DH, Bandeen-Roche K. Towards patient-centered health services in India—a scale to measure patient perceptions of quality. *International Journal for Quality in Health Care*. 2006; 18(6):414-21.
4. Chirdan O, Lar L, Afolaranmi T, Inalegwu E, Igoh C, Adah G. Client satisfaction with maternal health services comparison between public and private hospitals in Jos Nigeria. *Jos Journal of Medicine*. 2013; 7(1):1-9.
5. Matejic B, Milicevic MŠ, Vasic V, Djikanovic B. Maternal satisfaction with organized perinatal care in Serbian public hospitals. *BMC pregnancy and childbirth*. 2014; 14(1):14.
6. Srivastava A, Avan BI, Rajbangshi P, Bhattacharyya S. Determinants of women's satisfaction with maternal health care: a review of literature from developing countries. *BMC pregnancy and childbirth*. 2015; 15(1):97.
7. UN. United Nations Transforming our world, the 2030 Agenda for Sustainable Development. 2015.
8. World Health Organization. UNICEF, WHO, World Bank, United Nations Population Division. The Inter-agency Group for Child Mortality Estimation (UN IGME). Levels and Trends in Child Mortality. Report 2015. New York, USA: UNICEF; 2015.
9. Central Statistical Agency (CSA) and ICF. Ethiopia Demographic and Health Survey. Addis Ababa, Ethiopia, and Rockville, Maryland, USA: CSA and ICF, 2016.
10. Jha, P., Larsson, M., Christensson, K. & Skoog Svanberg, A. Satisfaction with childbirth services provided in public health facilities: results from a cross-sectional survey among postnatal women in Chhattisgarh, India. *Glob Health Action*, 2017:10, 1386932.

11. Sika Avortri, G., Beke, A. & Abekah-Nkrumah, G. Predictors of satisfaction with child birth services in public hospitals in Ghana. *International journal of health care quality assurance*, 2011;24, 223-237.
12. Srivastava, A., Avan, B. I., Rajbangshi, P. & Bhattacharyya, S. Determinants of women's satisfaction with maternal health care: a review of literature from developing countries. *BMC pregnancy and childbirth*, 2015:15-97.
13. Chirdan, O., Lar, L., Afolaranmi, T., Inalegwu, E., Igoh, C. & Adah, G. Client satisfaction with maternal health services comparisons between public and private hospitals in Jos Nigeria. *Jos Journal of Medicine*, 2013:7, 1-9.
14. Bazant E, Koenig M. Women's satisfaction with delivery care in Nairobi's informal settlements. *International Journal for Quality in Health Care*. 2009; 21(2):79-86.
15. WHO. World Health Organization recommendations on antenatal care for a positive pregnancy experience, <http://apps.who.int/iris/bitstream/10665/250796/1/9789241549912-eng>, 2016.
16. Downes MJ, Brennan ML, Williams HC, Dean RS. Development of a critical appraisal tool to assess the quality of cross-sectional studies (AXIS). *BMJ open*. 2016; 6(12):e011458.
17. Rücker G, Schwarzer G, Carpenter JR, Schumacher M. Undue reliance on  $I^2$  in assessing heterogeneity may mislead. *BMC medical research methodology*. 2008; 8:79.
18. Nyaga VN, Arbyn M, Aerts M. Metaprop: a Stata command to perform meta-analysis of binomial data. *Archives of Public Health*. 2014; 72(1):39.
19. Gizaw Dessie Asres. Satisfaction of maternal care among women delivered at Asrade Zewude Memorial Primary Hospital, Bure, West Gojjam, Amhara, Ethiopia: A cross sectional study. *J. Public Health Epidemiol*
20. Getenet et al. Women's satisfaction with intrapartum care and its predictors at harar hospitals, eastern ethiopia: a cross-sectional study. *Nursing: research and reviews* 2019:9.
21. Temamo AA, Abebe A, Menta AA (2018) Mothers' Satisfaction with Institutional Delivery Service and Associated Factors among Women Attending Hospitals in Wolaita Zone Administration, SNNPR, Ethiopia. *J Nutr Diet Pract* 2: 001-012.
22. Edaso AU, Teshome GS. Mothers' satisfaction with delivery services and associated factors at health institutions in west Arsi, Oromia regional state,

- 1  
2  
3 Ethiopia. *MOJ Womens Health*. 2019;8(1):110–119. DOI:  
4 10.15406/mojwh.2019.08.00222  
5  
6 23. Gashaye KT, Tsegaye AT, Shiferaw G, Worku AG, Abebe SM (2019) Client  
7 satisfaction with existing labor and delivery care and associated factors among  
8 mothers who gave birth in university of Gondar teaching hospital; Northwest  
9 Ethiopia: Institution based cross-sectional study. PLoS ONE 14(2): e0210693  
10  
11 24. Yarinbab TE, Ambo WA, Regea T, G/Mariam A (2019) Level of Maternal  
12 Satisfaction and its Determinants at Health Facilities in Mizan-Aman Town,  
13 Ethiopia: Cross Sectional Study. *Int J Womens Health Wellness* 5:088  
14  
15 25. Demas et al. Women's satisfaction with intrapartum care in St Paul's Hospital  
16 Millennium Medical College Addis Ababa Ethiopia: a cross sectional study *BMC*  
17 *Pregnancy and Childbirth* (2017) 17:253  
18  
19 26. Kurabachew Bitew et al. Maternal Satisfaction on Delivery Service and Its  
20 Associated Factors among Mothers Who Gave Birth in Public Health Facilities of  
21 Debre Markos Town, Northwest Ethiopia. *BioMed Research International* Volume  
22 2015  
23  
24 27. Addisalem Kidane. Maternal satisfaction and associated factors towards delivery  
25 service among mothers who gave birth at public hospitals in harar city, eastern  
26 Ethiopia. MSc dissertation haramaya university repository  
27  
28 28. Tadele Melese et al. Assessment of client satisfaction in labor and delivery  
29 services at a maternity referral hospital in Ethiopia. *Pan African Medical Journal*.  
30 **2014; 17:76**  
31  
32 29. Gonie A, Tebeje B, Sinaga M (2018) Satisfaction towards Skilled Delivery Services  
33 and Associated Factors among Mothers who Gave Birth at Government Health  
34 Facilities, Jimma Town, Ethiopia. *Clinics Mother Child Health* 15: 302.  
35 doi:10.4172/2090-7214.1000302  
36  
37 30. Tayelgn et al. Mothers' satisfaction with referral hospital delivery service in  
38 Amhara Region, Ethiopia. *BMC pregnancy and childbirth*. 2011, 11:78  
39  
40 31. Dewana et al. Client perspective assessment of women's satisfaction towards  
41 labour and delivery care service in public health facilities at Arba Minch town and  
42 the surrounding district, Gamo Gofa zone, south Ethiopia. *Reproductive health*  
43 (2016) 13:11  
44  
45  
46  
47  
48  
49  
50  
51  
52  
53  
54  
55

- 1  
2  
3  
4  
5  
6  
7  
8  
9  
10  
11  
12  
13  
14  
15  
16  
17  
18  
19  
20  
21  
22  
23  
24  
25  
26  
27  
28  
29  
30  
31  
32  
33  
34  
35  
36  
37  
38  
39  
40  
41  
42  
43  
44  
45  
46  
47  
48  
49  
50  
51  
52  
53  
54  
55  
56  
57  
58  
59  
60
32. Rahel Tesfaye et al. Client Satisfaction with Delivery Care Service and Associated Factors in the Public Health Facilities of Gamo Gofa Zone, Southwest Ethiopia: *In a Resource Limited Setting*. *Obstetrics and Gynecology International* Volume 2016
  33. Mekonnen *et al.* Women's satisfaction with childbirth care in Felege Hiwot Referral Hospital, Bahir Dar city, Northwest Ethiopia, 2014: cross sectional study. *BMC Res Notes* (2015) 8:528
  34. Amdemichael R, Tafa M, Fekadu H (2014) Maternal Satisfaction with the Delivery Services in Assela Hospital, Arsi Zone, Oromia Region. *Gynecol Obstet (Sunnyvale)* 4: 257. doi:10.4172/2161-0932.1000257
  35. Biniyam Haile Tadesse, Negalign Birhanu Bayou, Gebeyehu Tsega Nebeb. Mothers' Satisfaction with Institutional Delivery Service in Public Health Facilities of Omo Nada District, Jimma Zone. *Clinical Medicine Research*. Vol. 6, No. 1, 2017, pp. 2330. doi: 10.11648/j.cmr.20170601.13
  36. Blen Assefa. Maternal satisfaction with delivery services of public health centers in Addis Ababa, Ethiopia, 2017. MSc dissertation Addis Ababa university repository.
  37. Demis eta al. maternal satisfaction towards intrapartum nursing care at north wollo public health institutions in Ethiopia.
  38. Duval, S., and R. L. Tweedie. 2000a. Trim and fill: A simple funnel-plot-based method of testing and adjusting for publication bias in meta-analysis. *Biometrics* 56: 455–463
  39. Paridhi Jha, Margareta Larsson, Kyllike Christensson & Agneta Skoog Svanberg (2017) Satisfaction with childbirth services provided in public health facilities: results from a cross-sectional survey among postnatal women in Chhattisgarh, India, *Global Health Action*, 10:1, 1386932
  40. Sayed W, ElAal DEM, Mohammed HS, Abbas AM, Zahran KM. Maternal satisfaction with delivery services at tertiary University hospital in Upper Egypt, is it actually satisfying?. *Int J Reprod Contracept Obstet Gynecol* 2018;7:2547-52.
  41. Oikawa M, Sonko A, Faye E, Ndiaye P, Diadihou M, Kondo M. Assessment of maternal satisfaction with facility-based childbirth care in the rural region of Tambacouda, Senegal. *Afr J Reprod Health*. 2014;18(4):95.



- 1  
2  
3  
4 42. Devi Kumari Sapkota, Mathura Sapkota, Bishnu Kumari Shrestha. Mothers' satisfaction on maternity care services in bharatpur hospital chitwan, Nepal. International Journal of Scientific and Research Publications, Volume 8, Issue 9, September 2018  
5  
6  
7  
8  
9  
10 43. Srivastava et al.. Determinants of women's satisfaction with maternal health care: a review of literature from developing countries. BMC Pregnancy and Childbirth (2015) 15:97  
11  
12  
13  
14 44. Kigenyi et al. Quality of intrapartum care at Mulago national referral hospital, Uganda: clients' perspective BMC Pregnancy and Childbirth 2013, 13:162  
15  
16  
17 45. Matejić B, Milićević Milena Šantrić, Vasić V, Djikanović B. Maternal satisfaction with organized perinatal care in Serbian public hospitals. *BMC Pregnancy Childbirth*. 2014;14(1):14:14.  
18  
19  
20  
21  
22  
23  
24  
25  
26  
27  
28  
29  
30  
31  
32  
33  
34  
35  
36  
37  
38  
39  
40  
41  
42  
43  
44  
45  
46  
47  
48  
49  
50  
51  
52  
53  
54  
55  
56  
57  
58  
59  
60

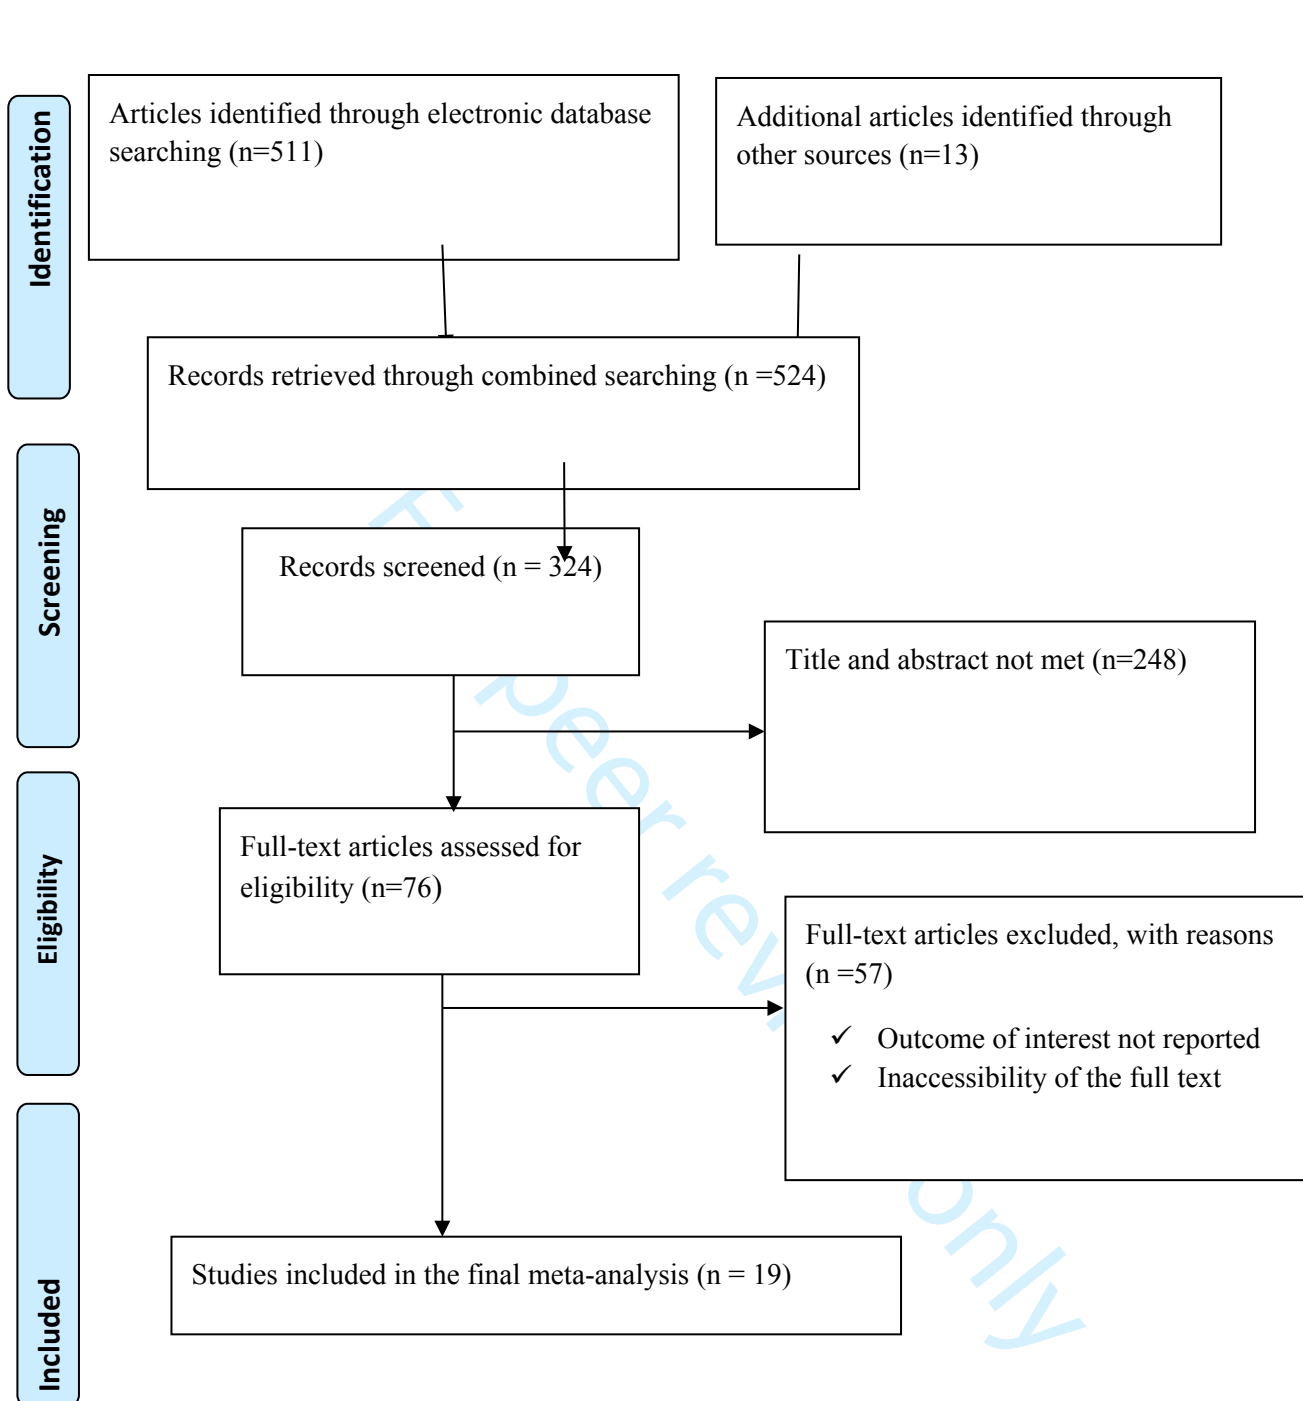

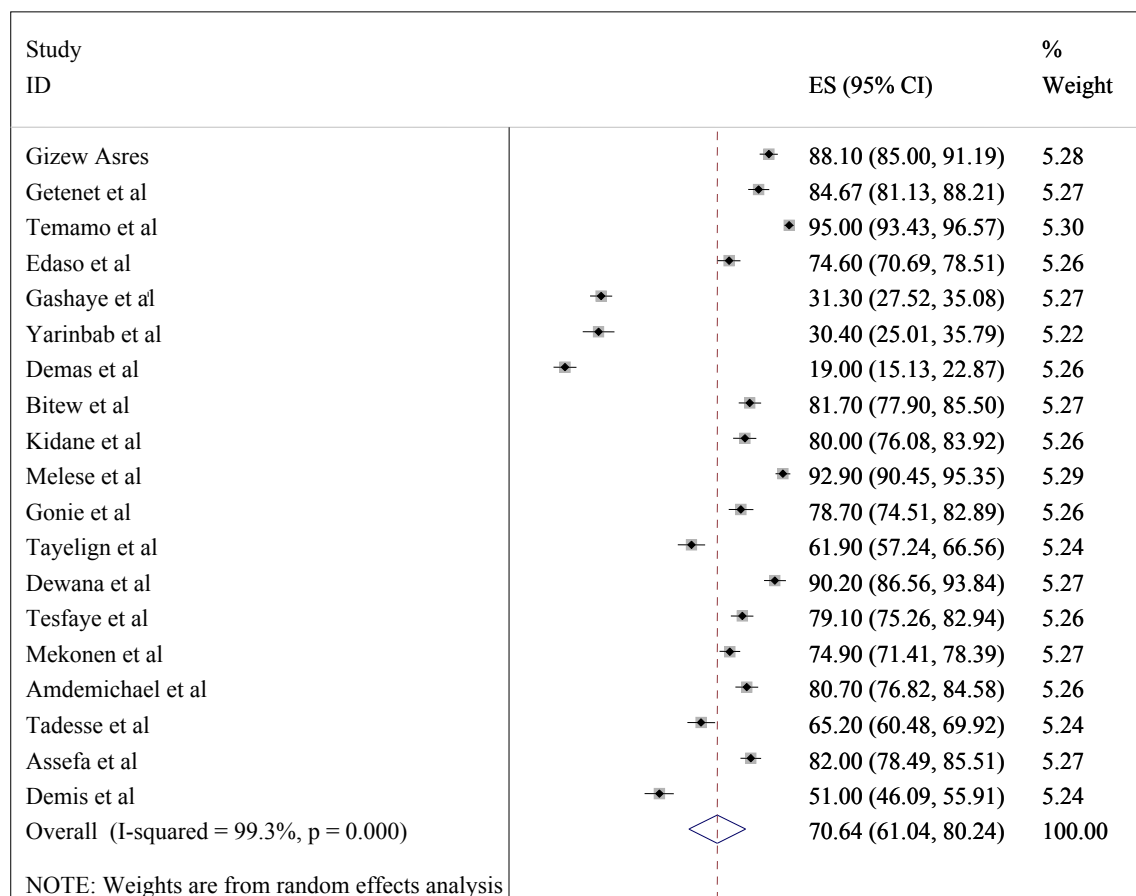

0.10

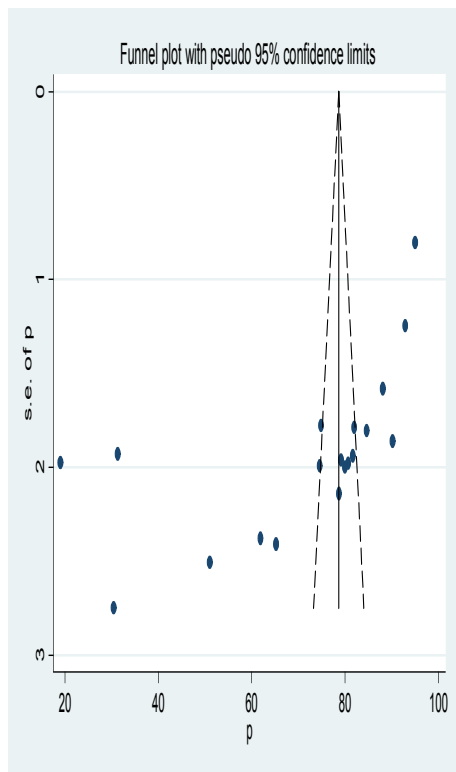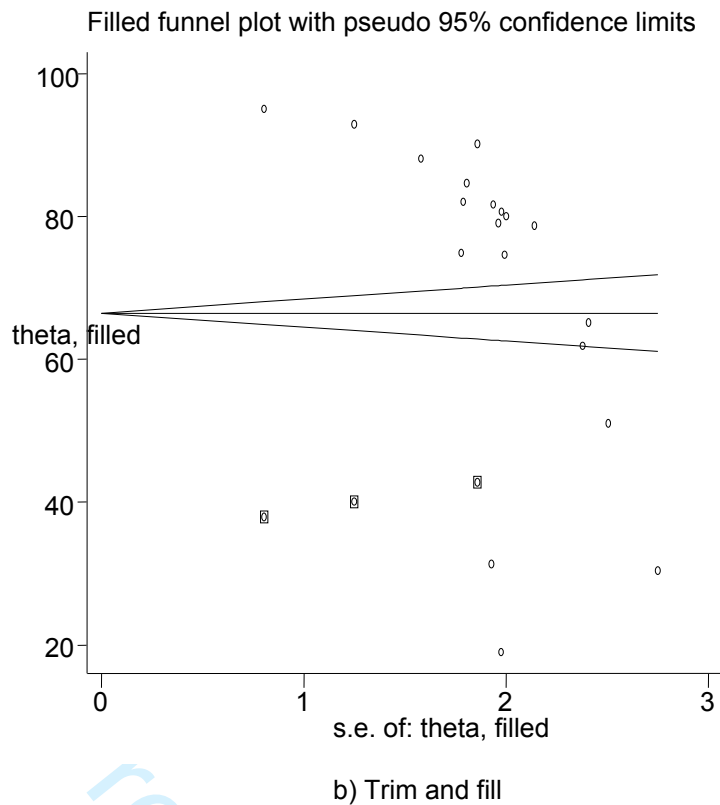

review only

1  
2  
3  
4  
5  
6  
7  
8  
9  
10  
11  
12  
13  
14  
15  
16  
17  
18  
19  
20  
21  
22  
23  
24  
25  
26  
27  
28  
29  
30  
31  
32  
33  
34  
35  
36  
37  
38  
39  
40  
41  
42  
43  
44  
45  
46  
47  
48  
49  
50  
51  
52  
53  
54  
55  
56  
57  
58  
59  
60

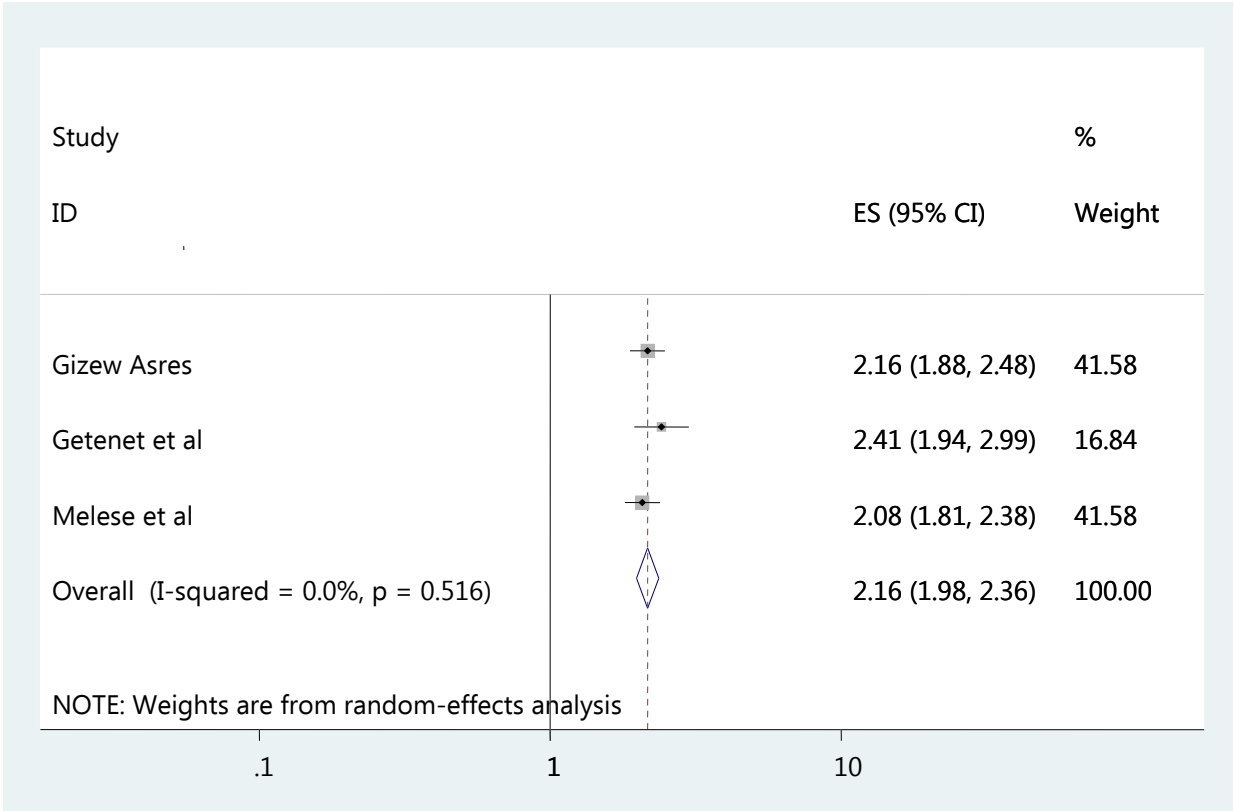

Review only

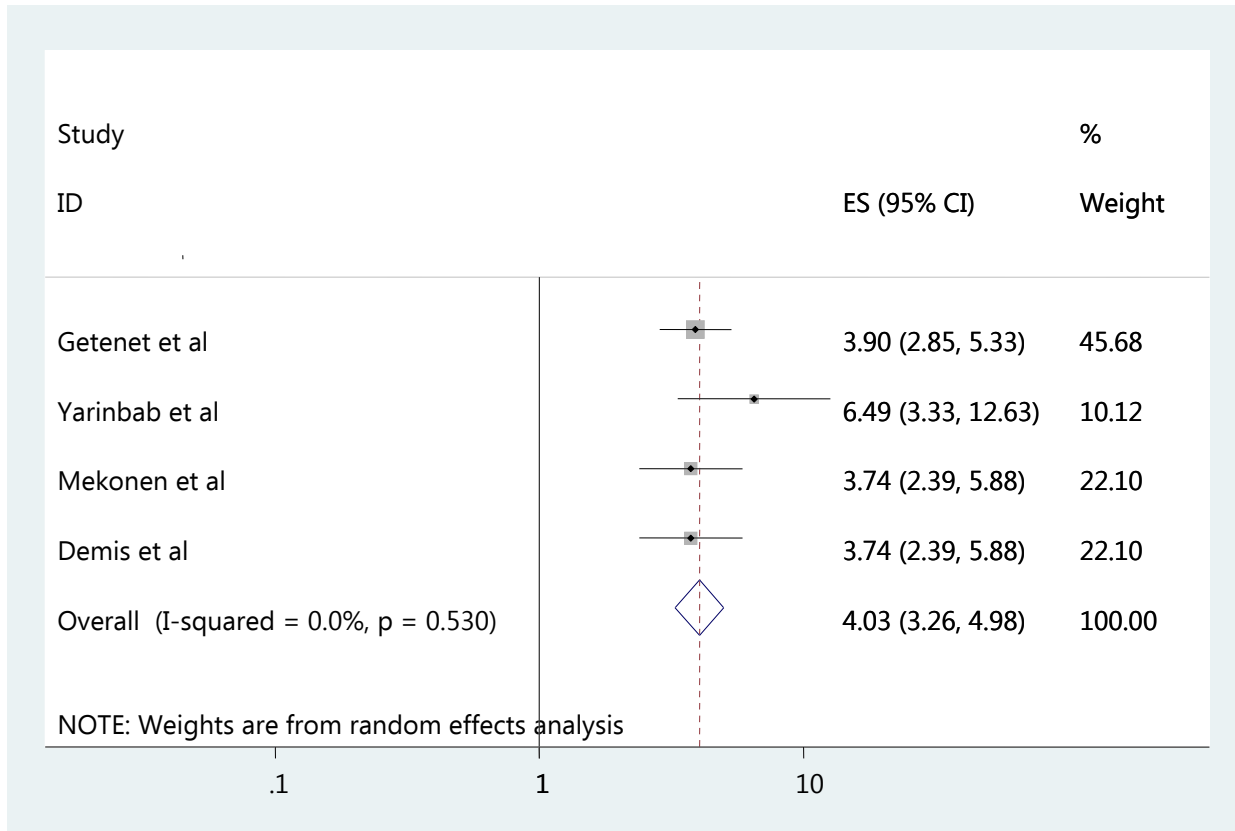

view only

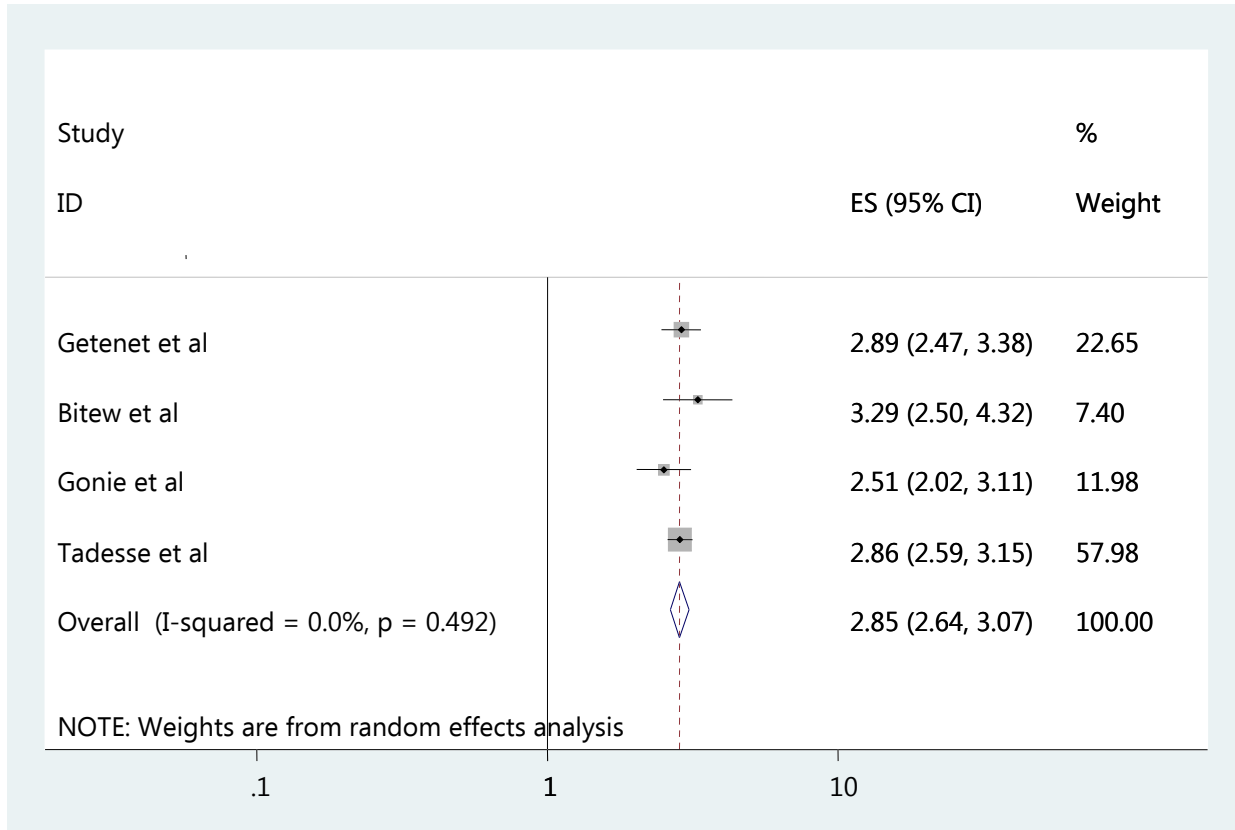

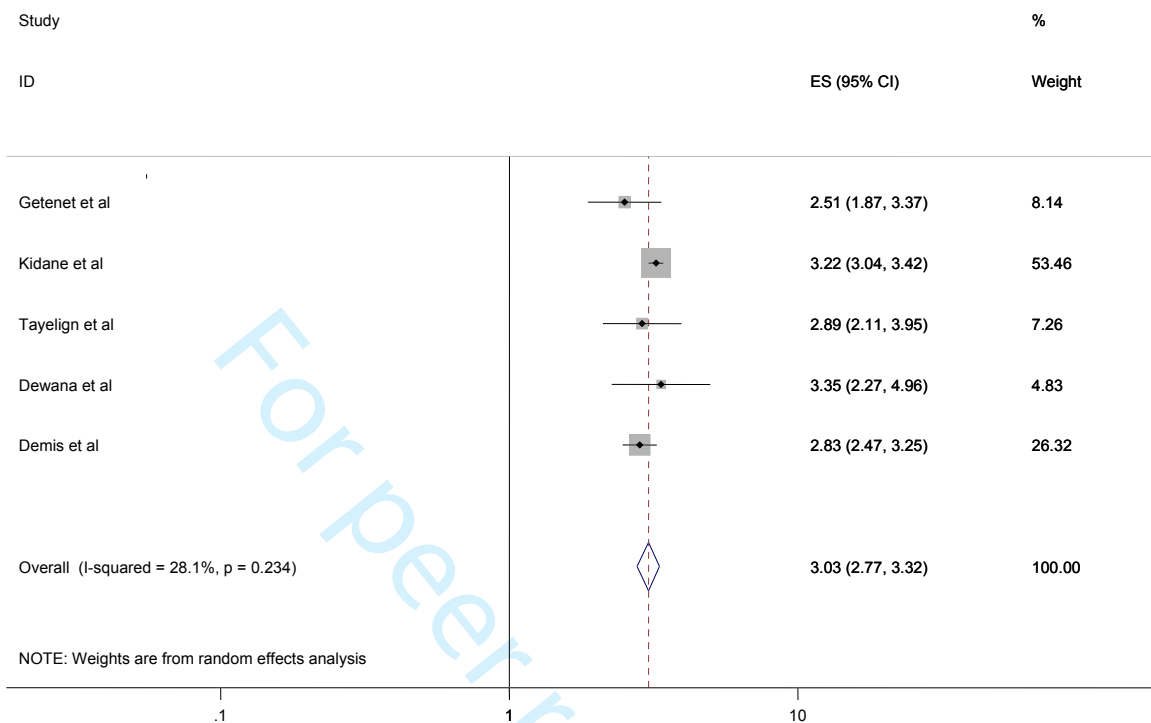



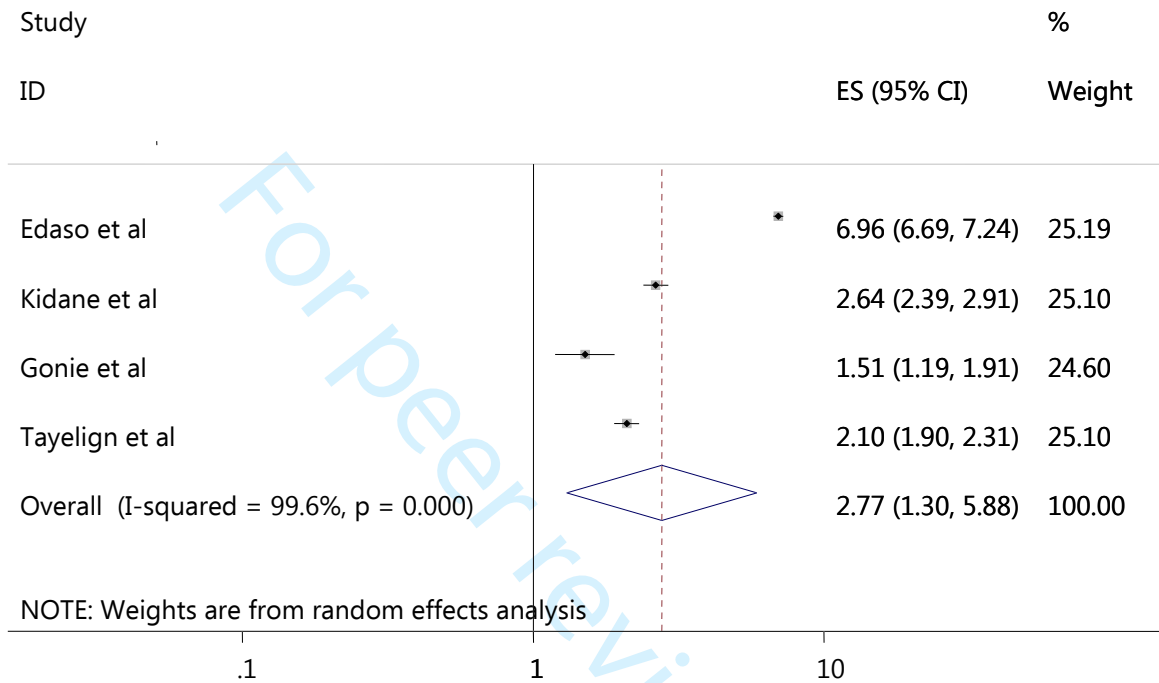

Figure 8: The pooled odds ratio of the association between privacy of the mother and satisfaction of women with labor and delivery services in Ethiopia

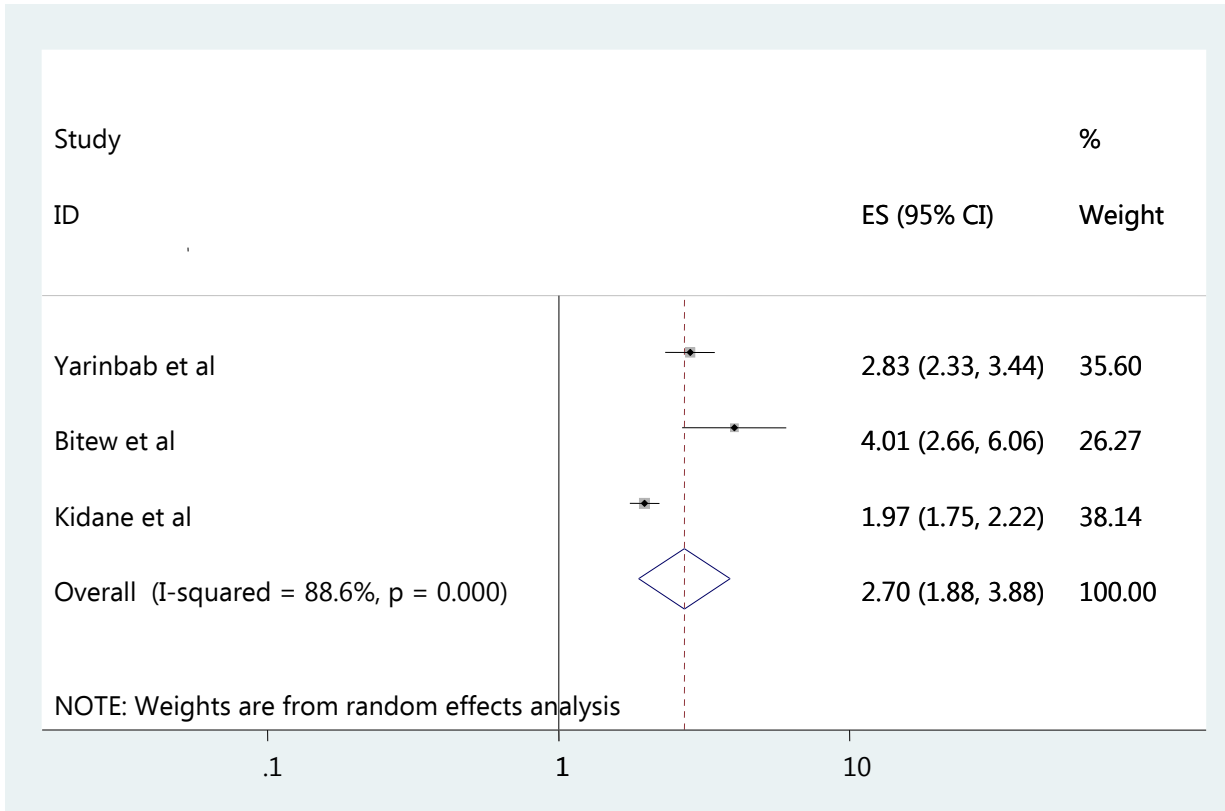

Review only

1  
2  
3  
4  
5  
6  
7  
8  
9  
10  
11  
12  
13  
14  
15  
16  
17  
18  
19  
20  
21  
22  
23  
24  
25  
26  
27  
28  
29  
30  
31  
32  
33  
34  
35  
36  
37  
38  
39  
40  
41  
42  
43  
44  
45  
46  
47  
48  
49  
50  
51  
52  
53  
54  
55  
56  
57  
58  
59  
60

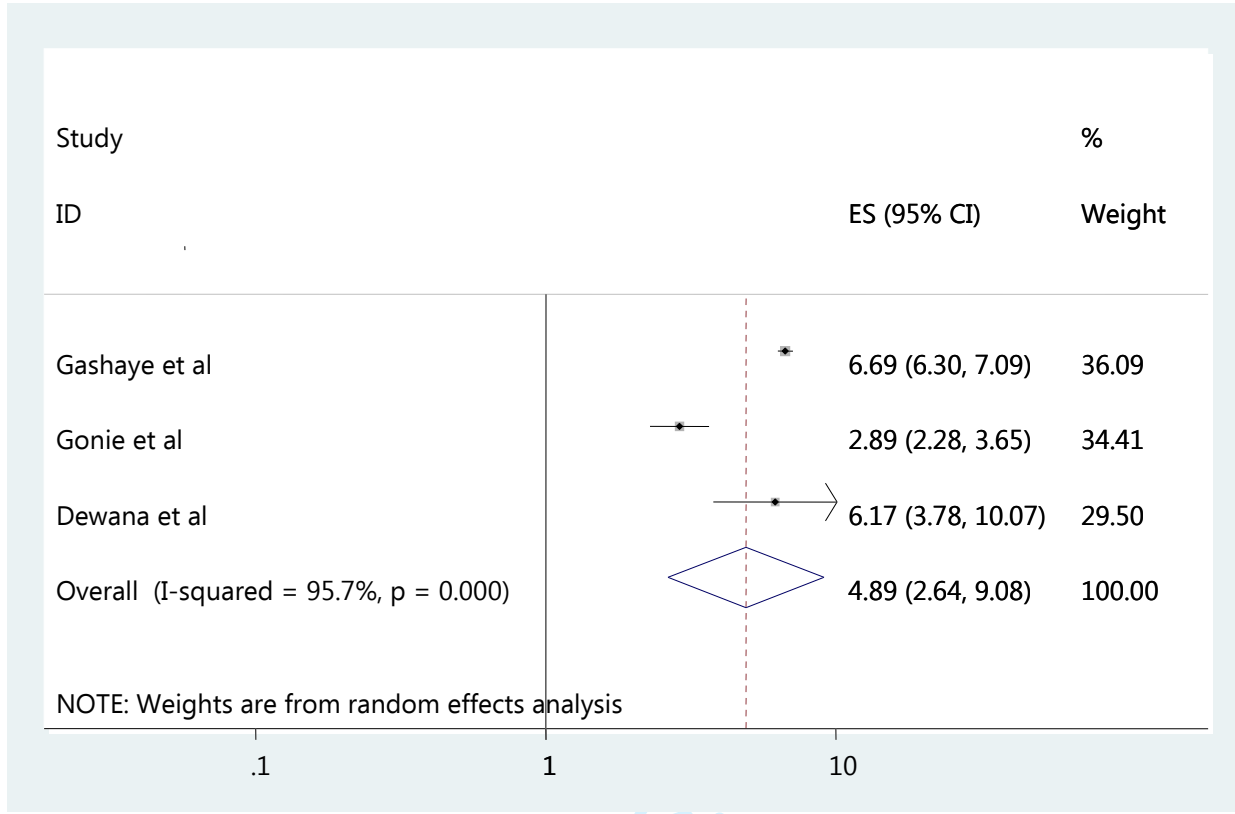

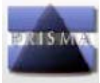

# PRISMA 2009 Checklist

| Section/topic                      | #  | Checklist item                                                                                                                                                                                                                                                                                              | Reported on page # |
|------------------------------------|----|-------------------------------------------------------------------------------------------------------------------------------------------------------------------------------------------------------------------------------------------------------------------------------------------------------------|--------------------|
| <b>TITLE</b>                       |    |                                                                                                                                                                                                                                                                                                             |                    |
| Title                              | 1  | Identify the report as a systematic review, meta-analysis, or both.                                                                                                                                                                                                                                         | 1                  |
| <b>ABSTRACT</b>                    |    |                                                                                                                                                                                                                                                                                                             |                    |
| Structured summary                 | 2  | Provide a structured summary including, as applicable: background; objectives; data sources; study eligibility criteria, participants, and interventions; study appraisal and synthesis methods; results; limitations; conclusions and implications of key findings; systematic review registration number. | 2                  |
| <b>INTRODUCTION</b>                |    |                                                                                                                                                                                                                                                                                                             |                    |
| Rationale                          | 3  | Describe the rationale for the review in the context of what is already known.                                                                                                                                                                                                                              | 3                  |
| Objectives                         | 4  | Provide an explicit statement of questions being addressed with reference to participants, interventions, comparisons, outcomes, and study design (PICOS).                                                                                                                                                  | 4                  |
| <b>METHODS</b>                     |    |                                                                                                                                                                                                                                                                                                             |                    |
| Protocol and registration          | 5  | Indicate if a review protocol exists, if and where it can be accessed (e.g., Web address), and, if available, provide registration information including registration number.                                                                                                                               | NA                 |
| Eligibility criteria               | 6  | Specify study characteristics (e.g., PICOS, length of follow-up) and report characteristics (e.g., years considered, language, publication status) used as criteria for eligibility, giving rationale.                                                                                                      | 5                  |
| Information sources                | 7  | Describe all information sources (e.g., databases with dates of coverage, contact with study authors to identify additional studies) in the search and date last searched.                                                                                                                                  | 5                  |
| Search                             | 8  | Present full electronic search strategy for at least one database, including any limits used, such that it could be repeated.                                                                                                                                                                               | 5                  |
| Study selection                    | 9  | State the process for selecting studies (i.e., screening, eligibility, included in systematic review, and, if applicable, included in the meta-analysis).                                                                                                                                                   | 5,6                |
| Data collection process            | 10 | Describe method of data extraction from reports (e.g., piloted forms, independently, in duplicate) and any processes for obtaining and confirming data from investigators.                                                                                                                                  | 6                  |
| Data items                         | 11 | List and define all variables for which data were sought (e.g., PICOS, funding sources) and any assumptions and simplifications made.                                                                                                                                                                       | 6                  |
| Risk of bias in individual studies | 12 | Describe methods used for assessing risk of bias of individual studies (including specification of whether this was done at the study or outcome level), and how this information is to be used in any data synthesis.                                                                                      | 6,7                |
| Summary measures                   | 13 | State the principal summary measures (e.g., risk ratio, difference in means).                                                                                                                                                                                                                               | 7                  |
| Synthesis of results               | 14 | Describe the methods of handling data and combining results of studies, if done, including measures of consistency (e.g., $I^2$ ) for each meta-analysis.                                                                                                                                                   | 7                  |

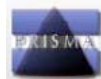

# PRISMA 2009 Checklist

1  
2  
3  
4  
5  
6  
7  
8  
9  
10  
11  
12  
13  
14  
15  
16  
17  
18  
19  
20  
21  
22  
23  
24  
25  
26  
27  
28  
29  
30  
31  
32  
33  
34  
35  
36  
37  
38  
39  
40  
41  
42  
43  
44  
45  
46  
47

| Section/topic                 | #  | Checklist item                                                                                                                                                                                           | Reported on page # |
|-------------------------------|----|----------------------------------------------------------------------------------------------------------------------------------------------------------------------------------------------------------|--------------------|
| Risk of bias across studies   | 15 | Specify any assessment of risk of bias that may affect the cumulative evidence (e.g., publication bias, selective reporting within studies).                                                             | 7                  |
| Additional analyses           | 16 | Describe methods of additional analyses (e.g., sensitivity or subgroup analyses, meta-regression), if done, indicating which were pre-specified.                                                         | 7,8                |
| <b>RESULTS</b>                |    |                                                                                                                                                                                                          |                    |
| Study selection               | 17 | Give numbers of studies screened, assessed for eligibility, and included in the review, with reasons for exclusions at each stage, ideally with a flow diagram.                                          | 8                  |
| Study characteristics         | 18 | For each study, present characteristics for which data were extracted (e.g., study size, PICOS, follow-up period) and provide the citations.                                                             | 9,10               |
| Risk of bias within studies   | 19 | Present data on risk of bias of each study and, if available, any outcome level assessment (see item 12).                                                                                                | 11,12              |
| Results of individual studies | 20 | For all outcomes considered (benefits or harms), present, for each study: (a) simple summary data for each intervention group (b) effect estimates and confidence intervals, ideally with a forest plot. | 13-14              |
| Synthesis of results          | 21 | Present results of each meta-analysis done, including confidence intervals and measures of consistency.                                                                                                  | 14-21              |
| Risk of bias across studies   | 22 | Present results of any assessment of risk of bias across studies (see Item 15).                                                                                                                          | 18                 |
| Additional analysis           | 23 | Give results of additional analyses, if done (e.g., sensitivity or subgroup analyses, meta-regression [see Item 16]).                                                                                    | 19                 |
| <b>DISCUSSION</b>             |    |                                                                                                                                                                                                          |                    |
| Summary of evidence           | 24 | Summarize the main findings including the strength of evidence for each main outcome; consider their relevance to key groups (e.g., healthcare providers, users, and policy makers).                     | 22                 |
| Limitations                   | 25 | Discuss limitations at study and outcome level (e.g., risk of bias), and at review-level (e.g., incomplete retrieval of identified research, reporting bias).                                            | 2                  |
| Conclusions                   | 26 | Provide a general interpretation of the results in the context of other evidence, and implications for future research.                                                                                  | 25                 |
| <b>FUNDING</b>                |    |                                                                                                                                                                                                          |                    |
| Funding                       | 27 | Describe sources of funding for the systematic review and other support (e.g., supply of data); role of funders for the systematic review.                                                               | 25                 |

From: Moher D, Liberati A, Tetzlaff J, Altman DG, The PRISMA Group (2009). Preferred Reporting Items for Systematic Reviews and Meta-Analyses: The PRISMA Statement. PLoS Med 6(7): e1000097. doi:10.1371/journal.pmed1000097

For more information, visit: [www.prisma-statement.org](http://www.prisma-statement.org).

# BMJ Open

## Women's satisfaction with existing labor and delivery services in Ethiopia: a systematic review and meta-analysis

|                                 |                                                                                                                                                                                                                                                                                                              |
|---------------------------------|--------------------------------------------------------------------------------------------------------------------------------------------------------------------------------------------------------------------------------------------------------------------------------------------------------------|
| Journal:                        | <i>BMJ Open</i>                                                                                                                                                                                                                                                                                              |
| Manuscript ID                   | bmjopen-2019-036552.R1                                                                                                                                                                                                                                                                                       |
| Article Type:                   | Original research                                                                                                                                                                                                                                                                                            |
| Date Submitted by the Author:   | 10-Jun-2020                                                                                                                                                                                                                                                                                                  |
| Complete List of Authors:       | Demis, Asmamaw; Woldia University, Nursing<br>Getie, Addisu; Woldia University, Nursing<br>Wondmieneh, Adam; Woldia University, Nursing<br>Bimerew, Melaku; Woldia University, Nursing<br>Alemnew, Birhan; Woldia University, Medical Laboratory sciences ;<br>Gedefaw, Getnet; Woldia University, Midwifery |
| <b>Primary Subject Heading</b>: | Obstetrics and gynaecology                                                                                                                                                                                                                                                                                   |
| Secondary Subject Heading:      | Public health, Qualitative research, Obstetrics and gynaecology, Medical management, Health services research                                                                                                                                                                                                |
| Keywords:                       | Maternal medicine < OBSTETRICS, PUBLIC HEALTH, EPIDEMIOLOGY                                                                                                                                                                                                                                                  |
|                                 |                                                                                                                                                                                                                                                                                                              |

SCHOLARONE™  
Manuscripts

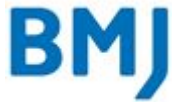

I, the Submitting Author has the right to grant and does grant on behalf of all authors of the Work (as defined in the below author licence), an exclusive licence and/or a non-exclusive licence for contributions from authors who are: i) UK Crown employees; ii) where BMJ has agreed a CC-BY licence shall apply, and/or iii) in accordance with the terms applicable for US Federal Government officers or employees acting as part of their official duties; on a worldwide, perpetual, irrevocable, royalty-free basis to BMJ Publishing Group Ltd ("BMJ") its licensees and where the relevant Journal is co-owned by BMJ to the co-owners of the Journal, to publish the Work in this journal and any other BMJ products and to exploit all rights, as set out in our [licence](#).

The Submitting Author accepts and understands that any supply made under these terms is made by BMJ to the Submitting Author unless you are acting as an employee on behalf of your employer or a postgraduate student of an affiliated institution which is paying any applicable article publishing charge ("APC") for Open Access articles. Where the Submitting Author wishes to make the Work available on an Open Access basis (and intends to pay the relevant APC), the terms of reuse of such Open Access shall be governed by a Creative Commons licence – details of these licences and which [Creative Commons](#) licence will apply to this Work are set out in our licence referred to above.

Other than as permitted in any relevant BMJ Author's Self Archiving Policies, I confirm this Work has not been accepted for publication elsewhere, is not being considered for publication elsewhere and does not duplicate material already published. I confirm all authors consent to publication of this Work and authorise the granting of this licence.

1  
2  
3 **Women's satisfaction with existing labor and delivery services in Ethiopia: a systematic review and**  
4 **meta-analysis**  
5

6 Asmamaw Demis<sup>1</sup>, Addisu Getie<sup>1</sup>, Adam Wondmieneh<sup>1</sup>, Melaku Bimerew<sup>1</sup>, Birhan Alemnew<sup>2</sup>, Getnet  
7 Gedefaw<sup>3\*</sup>  
8  
9

10  
11 <sup>1</sup>Department of Nursing, College of Health Sciences, Woldia University, Woldia, Ethiopia  
12

13  
14 <sup>2</sup>Department of Medical Laboratory Sciences, College of Health Sciences, Woldia University, Woldia,  
15 Ethiopia  
16

17  
18 <sup>3</sup>Department of Midwifery, College of Health Sciences, Woldia University, Woldia, Ethiopia  
19

20 \*Corresponding author: Getnet Gedefaw  
21

22 Email: [gedefawget@gmail.com](mailto:gedefawget@gmail.com)  
23  
24  
25  
26  
27  
28  
29  
30  
31  
32  
33  
34  
35  
36  
37  
38  
39  
40  
41  
42  
43  
44  
45  
46  
47  
48  
49  
50  
51  
52  
53  
54  
55



## Abstract

**Objective:** To estimate the pooled prevalence of women's satisfaction with existing labor and delivery services in Ethiopia.

**Design:** Systematic review and meta-analysis.

**Methods:** MEDLINE/PubMed, Scopus, Hinari, Google scholar, and web of science electronic databases were searched for the study. This meta-analysis included nineteen cross-sectional studies. Cochrane I<sup>2</sup> statistics were used to check the heterogeneity of the studies. Subgroup and sensitivity analysis was conducted with the evidence of heterogeneity. Egger test with funnel plot were used to investigate publication bias.

**Result:** Nineteen studies were included in the systematic review and meta-analysis. The overall prevalence of women's satisfaction with existing labor and delivery services in Ethiopia was 70.54% (95% CI: 60.94–80.15). Having informal education of the women (AOR = 2.19; 95% CI: 1.47- 3.25), time to be seen by the health care providers within 20 minutes (AOR = 2.97; 95% CI: 2.11- 4.19), receiving free service (AOR = 5.01; 95% CI: 2.87- 8.75), keeping women privacy (AOR = 2.84; 95% CI: 1.46- 5.55), planned delivery in the health institution (AOR = 2.85; 95% CI: 1.99- 4.07), duration of labor within 12 hours (AOR = 2.55; 95% CI: 1.70- 3.81), and haven't antenatal care follow up (AOR = 4.03; 95% CI: 2.21- 7.35) were factors associated with women satisfaction with labor and delivery services in Ethiopia.

**Conclusion:** The pooled prevalence of women's satisfaction with existing labor and delivery services was high. Informal education of the women, antenatal care follow up, planned delivery in the health institution, keeping women privacy, getting free service, time to be seen by the health care providers and duration of labor were factors associated with women's satisfaction during labor and delivery services. This finding is important to design strategic policies and to prevent emergency neonatal and women complications during the childbirth and postpartum periods.

**Keywords:** Delivery, Labor, Satisfaction, Meta-analysis

### Strength and limitation of the study

- ✓ The strength of this study is including wide geographical areas, different eligible articles across the country setting increases the accuracy of the finding.
- ✓ This systematic review and meta-analysis review provided an overall prevalence of women's satisfaction with the existing labor and delivery services in Ethiopia.
- ✓ This systematic review and meta-analysis result reporting was stick on to the Meta-analysis of Observational Studies in Epidemiology (MOOSE) guidelines
- ✓ Declaring the absence of publication bias by computing trim and fill analysis increase the reliability of the findings.
- ✓ All included studies in this systematic review and meta-analysis were cross-sectional studies, which may limit the opportunity to generate a causal link between variables.

## Introduction

Globally, nearly half million women die during the time of pregnancy and childbirth every year (1). More than two-third of obstetric complications has been carried out during labor and delivery. Around 99% of the global maternal deaths happened in Low and middle income countries; however 56% of the global burden accounted in sub-Saharan Africa and 5% of the global maternal death report existed in Ethiopia (2). Globally, 2.5 million neonates died during the neonatal period, moreover two in three neonates died on the day of birth due to inadequate labor and delivery services (3). Women's satisfaction with existing labor and delivery service is the best predictor for the choice of health facility, comply with service provided, follow up and early detection of complications and its management during prenatal, childbirth and postnatal period (4-8).

Access to proper and adequate labor and delivery services including medical attention and hygienic conditions can reduce the risk of complications and infections that may lead to death or serious illness for the mother and her baby (9). In Ethiopia, 50% of the delivery attended by a skilled provider and 48% of the deliveries were accompanied in the health facility (10). Despite Sustainable Development Goal (SDG) aimed to reduce the global maternal mortality rate to less than 70 per 100,000 live births, the quality of labor and delivery services in settings where lack of skilled professionals and medical equipment's had been identified as one of the precursors to the incongruously to have maternal mortality rate (11).

Ethiopia is still struggling to reduce maternal mortality rate in the country which stands at 412 deaths for every 100,000 live births, which is incredibly far from the sustainable development goal achievement with (12, 13). The cause can be linked with delay in receiving care due to inadequate skilled personnel in emergency obstetric care, inadequate supplies and equipment and poor quality of services (14). Identifying factors that affect women's satisfaction with existing labor and delivery services is imperative for health care providers to improve the quality of labor and delivery services continuously. Women's satisfaction with existing labor and delivery services can be affected by numerous factors such as; waiting time and availability of basic drugs, physical environment of the health care facility (cleanliness of the environment, delivery room and wards), privacy, cost paid to service and waiting area, lack of consideration for cultural practices and beliefs and health providers' technical competency (15-19).

World Health Organization promotes skilled birth attendance at every birth to reduce maternal mortality and recommends that women's satisfaction is the most important index to improve the quality and

effectiveness of health care provision Moreover, only provision of maternal health care services does not improve maternal health and her babies (20).

Although studies have been conducted to assess women's satisfaction with existing labor and delivery services in Ethiopia, however, the representativeness and the findings of a single study are not conclusive and consistent. Likewise, at national level, the proportion of women satisfaction with existing labor and delivery services remains unknown yet. Therefore, this systematic review and meta-analysis aimed to estimate the level of women's satisfaction with existing labor and delivery services in Ethiopia and to identify predictors of women's satisfaction with existing labor and delivery services. Furthermore, the finding of this study will be important to monitor and improve the quality of labor and delivery services. Improving maternity care services in the health care system of the country has a vital role to reduce maternal mortality and morbidity related to complications of pregnancy, labor and delivery.

## Methods

### Study design and setting

This systematic review and meta-analysis were conducted to assess the pooled prevalence of women's satisfaction towards labour and delivery services and its associated factors in Ethiopia, 2019.

### Reporting

This systematic review and meta-analysis was presented according to the Meta-analysis of Observational Studies in Epidemiology (MOOSE) (**Table S1**)

### PROSPERO Registration code: CRD42020149217

Figure 1: Flow chart of study selection for systematic review and meta-analysis of women satisfaction with labor and delivery services and its associated factors in Ethiopia

### Search Strategies

Studies were searched from databases MEDLINE/PubMed, Hinari, Google scholar, and web of science electronic databases and grey literature from repository. Besides, research articles from MEDNAR, World Wide Science Maternity and Infant Care and Wiley Online Library were retrieved (**Table 1**). Moreover, missing data were handled by contacting corresponding authors. Comprehensive search strategy had been developed using different Boolean operators via PICO standard questions. The following search terms were used using OR and AND Boolean operators: satisfaction AND "delivery Services" OR "delivery care services" OR "skilled delivery services" OR "institutional delivery services" OR "Labor" OR "labor and delivery services" OR "labor and delivery care" OR "labor and delivery care services" OR "intrapartum care"

OR "childbirth care" OR "childbirth care services" AND "mother's" OR "women" OR "clients" AND "associated factors" AND Ethiopia and related terms. All articles searched from databases was exported to End Note library and initially screening by title and abstract. The full text of those articles satisfying inclusion criteria by title and abstract were reviewed the full articles. Systematic review with narrative synthesis was used to summarize the findings of articles in Ethiopia. Quantitative meta-analysis was considered for the articles that are homogeneous.

### Eligibility criteria

#### Inclusion criteria

**Population:** Only studies involving women who gave birth in public and private institutions

**Study design:** All observational studies (i.e cross-sectional, case-control, and retrospective and prospective cohort studies and national survey and surveillance reports) were considered for this review.

**Study area:** Only studies conducted in Ethiopia without time limiting and reported the prevalence or at least one associated factors of women satisfaction towards labour and delivery services.

**Publication status and language:** Only English language literature and research articles were included

**Search date:** All research articles accessed from 01-30/9/2019 were included

#### Exclusion criteria

Citations without abstracts and/or full-text, commentaries, anonymous reports, letters, editorials and articles not reporting our outcome of interest were excluded after reviewing the full texts.

**Table 1:** Example of searches for the MEDLINE/ PubMed and Google Scholar databases to assess Women's satisfaction with existing labor and delivery services in Ethiopia.

| Databases      | Searching terms                                                                                                                                                                                                                                                                                                                  | Number of studies |
|----------------|----------------------------------------------------------------------------------------------------------------------------------------------------------------------------------------------------------------------------------------------------------------------------------------------------------------------------------|-------------------|
| PubMed         | ("satisfaction" AND "delivery care services"[All Fields] OR "childbirth care"[All Fields] OR "labor services"[MeSH Terms]) OR ("skilled delivery services"[All Fields] OR "intrapartum care"[MeSH Terms] AND women[All Fields] OR ("client"[MeSH Terms] OR "mother"[All Fields] AND "determinants" AND ("Ethiopia" [MeSH Terms]) | 41                |
| Google scholar | "Satisfaction" and "determinants" or "associated                                                                                                                                                                                                                                                                                 | 113               |

|                            |                                                                                     |     |
|----------------------------|-------------------------------------------------------------------------------------|-----|
|                            | factors " and "women" or "client" and "labor" or "delivery services" and "Ethiopia" |     |
| From other databases       |                                                                                     | 351 |
| Total retrieved articles   |                                                                                     | 524 |
| Number of included studies |                                                                                     | 19  |

### Outcome variables

This systematic review and meta-analysis had two main outcomes. Level of women satisfaction with existing labour and delivery services was the primary outcome whereas factors affecting satisfaction of women towards labour and delivery was the second outcome of the study.

### Data extraction

After collecting findings from all databases, the articles were exported to Microsoft Excel spreadsheet. Two authors (AD and GG) independently extracted the data and reviewed all the screened and included articles. Secondly, all studies were exported to Microsoft Excel spreadsheet. Data extraction was carried out using a standardized data extraction form which was adapted from the JBI data extraction format. Substantial agreement between reviewers i.e. Cohen's kappa coefficient  $>0.60$  was accepted and resolved through discussion and consensus. For the first outcome (prevalence) the data extraction format included (primary author, year of publication, regions, study area, sample size, and prevalence with 95%CI). For the factors affecting level of women satisfaction with labor and delivery services were extracted with 2 by 2 table format and then the log odds ratio for each factor was calculated.

### Quality assessment

Two authors (AD & GG) independently assessed the quality of each studies using Newcastle-Ottawa-scale (NOS) for cross-sectional studies (21).

The methodological quality, comparability, outcome and statistical analysis of the study were the major assessment tools that we used to declare the quality of the study. The inter-rater reliability (IRR) coefficient (Cohen's kappa) between two authors (AD & GG) was 0.95 which suggest that there was almost perfect level of agreement between two authors (22). Moreover, studies scored a scale of  $\geq 7$  out of 10 was considered as having good quality. During quality appraisal of the articles, any discrepancies

1  
2  
3 between the two authors were resolved by taking the second group authors (AW, AG, MB and BA). All of  
4 the studies were included based on the Newcastle –Ottawa Scale quality assessment criteria (**Table S2**).

### 8 **Data processing and analysis**

9  
10 Random effect model was applied to estimate the pooled prevalence of women satisfaction towards  
11 labour and delivery services. After extraction of the articles, the analysis was carried out using STATA  
12 version 14 statistical software. Cochrane Q-test and  $I^2$  statistics were computed to assess heterogeneity  
13 within the studies (23).After computing the statistics, results showed there is significant heterogeneity  
14 among studies ( $I^2 = 99.3\%$ ,  $p < 0.001$ ).To estimate the overall prevalence of having good knowledge of the  
15 postnatal women, via back-transform of the weighted mean of the transformed proportions arcsine  
16 variance weights and Dersimonian-Laird weights for fixed-effects model and random effect model  
17 respectively (24).Publication bias was assessed using egger's test. Subgroup analysis was done based on  
18 the study setting (study setting (region), year of study and sample size to minimize the random variations  
19 between the point estimates of the primary study. Furthermore, trim and fill analysis using Duval and  
20 Tweedie were implemented (25). Forest plot format was used to present the pooled point prevalence with  
21 95%CI. For associations, a log odds ratio was used to decide the association between associated factors  
22 and satisfaction of women towards delivery services in the included studies

### 31 **Patient and Public involvement**

32  
33 Neither patient nor public were involved in the review protocol, proposal development, the design and  
34 analysis of the study.

### 36 **Results**

#### 39 **Characteristics of the included studies**

40  
41  
42 524 articles were retrieved using a search strategy regarding women satisfaction towards labor and  
43 delivery and associated factors in Ethiopia at MEDLINE/PubMed, Scopus, Google Scholar,, Hinari,  
44 MEDNAR, World Wide Science, Maternity and Infant Care and Wiley Online Library, a web of science and  
45 other gray and online repository accessed literatures. After duplicates removed, 324 studies were  
46 remained. Out of the remaining 324 articles, 248 articles were excluded after review of their titles and  
47 abstracts. Therefore, 76 full-text articles were accessed and assessed for inclusion criteria, which resulted  
48 in the further exclusion of 57 articles primarily due to reasons. As a result, 19 studies were fulfilled the

inclusion criteria to undergo the final systematic review and meta-analysis. This systematic review and meta-analysis consist of nineteen cross sectional studies (**Fig. 1**).

In the present meta-analysis, a total of 19 cross sectional studies were included across different regions of Ethiopia. Amongst, six of the studies were from Amhara, four from SNNPR, two from Harari, three studies from Addis Ababa, four from Oromia. In this meta-analysis, 8614, study participants were involved to estimate the pooled prevalence of women satisfaction towards the existing labor and delivery services in Ethiopia. Concerning sample size, the sample size of the individual studies ranged from 256 to 736. The highest and lowest prevalence (95%) and (19%) of women satisfaction towards existing labor and delivery services were reported in studies conducted in Wolaitta Soddo Town, Southern Nations, Nationalities, and Peoples Region and Addis Ababa respectively (26-44) (**Table 2**).

Table 2: Study characteristics included in the systematic review and meta-analysis

| Authors             | Region      | Study area        | Study design    | Sample size | Prevalence | Quality  |
|---------------------|-------------|-------------------|-----------------|-------------|------------|----------|
| Gizew Asres (26)    | Amhara      | Bure              | cross sectional | 420         | 88.09      | Low risk |
| Getenet et al (27)  | Harari      | Harar             | cross sectional | 398         | 84.67      | Low risk |
| Temamo et al (28)   | SNNPR       | Wolaita           | cross sectional | 736         | 95.00      | Low risk |
| Edaso et al (29)    | Oromia      | West Arsi         | cross sectional | 477         | 74.60      | Low risk |
| Gashaye et al (30)  | Amhara      | Gondar            | cross sectional | 579         | 31.30      | Low risk |
| Yarinbab et al (31) | SNNPR       | Mizan             | cross sectional | 280         | 30.40      | Low risk |
| Demas et al (32)    | Addis Ababa | Addis Ababa       | cross sectional | 394         | 19.00      | Low risk |
| Bitew et al (33)    | Amhara      | Debre Markos      | cross sectional | 398         | 81.70      | Low risk |
| Kidane et al (34)   | Harari      | Harar             | cross sectional | 400         | 80.00      | Low risk |
| Melese et al (35)   | Addis Ababa | Addis Ababa       | cross sectional | 423         | 92.90      | Low risk |
| Gonie et al (36)    | Oromia      | Jimma             | cross sectional | 366         | 78.70      | Low risk |
| Tayelign et al (37) | Amhara      | Dessie & Bahirdar | cross sectional | 417         | 61.90      | Low risk |
| Dewana et al (38)   | SNNPR       | Arbaminch         | cross sectional | 256         | 90.20      | Low risk |
| Tesfaye et al (39)  | SNNPR*      | Gamogofa zone     | cross sectional | 430         | 79.10      | Low risk |
| Mekonen et al (40)  | Amhara      | Bahirdar          | cross sectional | 594         | 74.90      | Low risk |



|                        |             |             |                 |     |       |          |
|------------------------|-------------|-------------|-----------------|-----|-------|----------|
| Amdemichael et al (41) | Oromia      | Assela      | cross sectional | 398 | 80.70 | Low risk |
| Tadesse et al (42)     | Oromia      | Omo Nada    | cross sectional | 391 | 65.20 | Low risk |
| Assefa et al (43)      | Addis Ababa | Addis Ababa | cross sectional | 461 | 82.00 | Low risk |
| Demis et al (44)       | Amhara      | Woldia      | cross sectional | 398 | 51.00 | Low risk |

\* Southern Nation Nationalities and Peoples Region

### Level of women satisfaction with labor and delivery services in Ethiopia

The overall pooled prevalence of women satisfaction with existing labor and delivery services presented with a forest plot (**Fig.2**). Therefore, the pooled estimated prevalence of women satisfaction with labor and delivery services in Ethiopia was 70.54% (95% CI: 60.94–80.15;  $I^2=99.3\%$ ,  $P<0.001$ ).

### Publication bias

Funnel plot was assessed for asymmetry distribution of women satisfaction with labor and delivery services by visual inspection (**Fig. 3 (a)**). Egger's regression test showed with a p-value of 0.002 with the evidence of publication bias. As a result, trim and fill analysis was conducted to overcome the publication bias. After three studies were filled, twenty two studies were enrolled and computed through trim and fill analysis (**Fig. 3 (b)**) with pooled prevalence of 66.36% (95%CI: 55.52-77.20) using random effect model.

### Sensitivity analysis

In this meta-analysis, to investigate the potential source of heterogeneity observed in pooled prevalence of women satisfaction with existing labor and delivery service a leave-one-out sensitivity analysis was executed and suggesting that our findings was not dependent on a single study. The pooled prevalence of women satisfaction with existing labor and delivery service was varied between 69.18% (95%CI: 59.25-79.09) and 73.43% (95%CI: 65.29-81.55) after deletion of a single study (**Table 3**).

Table 3: Sensitivity analysis of prevalence for each study being omitted with 95%CI: prevalence of women satisfaction with existing labor and delivery services in Ethiopia

| Study omitted            | Prevalence | 95%CI       |
|--------------------------|------------|-------------|
| Gizew A (2018)           | 69.56      | 59.39-79.73 |
| Getenet et al (2019)     | 69.75      | 59.62-79.88 |
| Temamo et al (2018)      | 69.18      | 59.25-79.09 |
| Edaso et al (2019)       | 70.31      | 60.22-80.41 |
| Gashaye et al (2019)     | 72.74      | 63.89-81.59 |
| Yarinbab et al (2019)    | 72.76      | 63.37-82.14 |
| Demas et al (2017)       | 73.43      | 65.29-81.55 |
| Bitew et al (2015)       | 70.02      | 59.92-80.12 |
| Kidane et al (2018)      | 70.01      | 59.91-80.12 |
| Melese et al (2014)      | 69.29      | 59.12-79.45 |
| Gonie et al (2018)       | 70.09      | 60.01-80.16 |
| Tayelign et al (2011)    | 71.02      | 61.08-80.96 |
| Dewana et al (2016)      | 69.44      | 59.38-79.50 |
| Tesfaye et al (2016)     | 70.06      | 59.95-80.18 |
| Mekonen et al (2015)     | 70.29      | 60.14-80.45 |
| Amdemichael et al (2014) | 69.98      | 59.87-80.08 |
| Tadesse et al (2017)     | 70.84      | 60.86-80.05 |
| Assefa et al (2017)      | 69.90      | 59.75-80.05 |
| Demis et al (2020)       | 71.62      | 61.84-81.41 |

### Subgroup analysis

Sub group analysis was conducted with the evidence of heterogeneity. Therefore sub group analysis was done by study year, sample size and study area. Based on the subgroup analysis, the level of women satisfaction with existing labor and delivery services was highest in Harari region 82.41% whereas 84.51 % in the study conducted within the year of 2006-2010 (**Table 4**).

Table 4: Sub group analysis on the level of women satisfaction with existing labor and delivery services in Ethiopia (n = 19)

| Variables   | Subgroup    | No. of studies | Prevalence (95%CI) | I <sup>2</sup> (%) | P-value |
|-------------|-------------|----------------|--------------------|--------------------|---------|
| Sample size | ≥400        | 10             | 76.02(65.05-86.99) | 99.2               | <0.001  |
|             | <400        | 9              | 64.45(47.72-81.17) | 99.3               | <0.001  |
| Study area  | Addis Ababa | 3              | 64.67(22.47-96.88) | 99.8               | <0.001  |
|             | Oromia      | 4              | 74.89(68.61-81.17) | 89.0               | <0.001  |
|             | Amhara      | 6              | 64.53(46.82-82.25) | 99.2               | <0.001  |
|             | Harari      | 2              | 82.41(77.84-86.99) | 66.7               | 0.083   |
|             | SNNPR       | 4              | 73.78(51.91-95.64) | 99.4               | <0.001  |
| Study year  | 2006-2010   | 2              | 84.51(73.20-95.82) | 94.0               | <0.001  |
|             | 2011-2015   | 7              | 74.63(69.40-79.86) | 91.6               | <0.001  |
|             | 2016-2019   | 10             | 64.95(48.19-81.70) | 99.6               | <0.001  |

### Associated factors for women satisfaction with labor and delivery services

In this systematic review and meta-analysis; duration of labor, free service, keeping privacy, time to be seen by health care provider <20minute, planned delivery in the health institution, antenatal care, and maternal education were the factors associated with women satisfaction with existing labor and delivery services.

Women who hadn't formal education were 2.19 times more likely to be satisfied with the existing labor and delivery services than women who had formal education (AOR = 2.19; 95% CI: 1.47- 3.25)(**Fig.4**).

1  
2  
3 The odds of women satisfaction with existing labor and delivery services were 4.03 times more likely  
4 among women who hadn't ANC follow-up as than women who had ANC follow up (AOR = 4.03; 95% CI:  
5 2.21- 7.35)(**Fig.5**).

6  
7  
8  
9 In this study women who had planned delivery in the health institution were 2.85 times more likely to be  
10 satisfied with existing labor and delivery services than their counterparts (AOR = 2.85; 95% CI: 1.99- 4.07),  
11 (**Fig.6**).

12  
13  
14  
15 Women who have seen by the health care provider within 20 minutes were 2.97 times more likely satisfied  
16 by the labor and delivery services than their counterparts (AOR = 2.97; 95% CI: 2.11- 4.19)(**Fig.7**).

17  
18  
19 Women whose privacy kept were 2.84 times more likely to be satisfied with the existing labor and delivery  
20 services as compared with their counterparts (AOR = 2.84; 95% CI: 1.46- 5.55)(**Fig.8**).

21  
22  
23  
24 The odds of women satisfaction with existing labor and delivery services were 2.55 times more likely  
25 among women not staying more than 12 hours to give birth than women who stayed more than 12 hours  
26 to give birth (AOR = 2.55; 95% CI: 1.70- 3.81) (**Fig.9**).

27  
28  
29  
30 Women who received the existing labor and delivery service without fee were 5.01 times more likely to be  
31 satisfied as compared with women who got their service with cost expense (AOR = 5.01; 95% CI: 2.87-  
32 8.75), (**Fig.10**).

## 33 34 35 36 **Discussion**

37  
38  
39 Globally critical maternity and infant care implementing efforts are important strategy to reduce maternal  
40 mortality has been stepped up, maternal satisfaction with the existing labor and delivery services need to  
41 be easily addressed in low and middle income countries. Quality improvement efforts in low and middle  
42 income countries could focus on strengthening the process of labor and delivery cares. In this systematic  
43 review and meta-analysis, the pooled level of women satisfaction with existing labor and delivery services  
44 in Ethiopia was 70.54% (95% CI: 60.94–80.15). The finding of this systematic review and meta-analysis is  
45 consistent with the study done in India (45), and Egypt (46). This similarity finding might be due to labor  
46 and delivery services provided in low and middle income countries are nearly similar due to the limited  
47 number of health institutions, health professionals and the availability of drugs whereas the finding of this  
48 study is lower than the study conducted in Senegal (47), and Nepal (48). The possible reason for this  
49  
50  
51  
52  
53  
54  
55

1  
2  
3 discrepancy might be due to, this study reports a review result from many institutions whereas studies  
4 reported in Senegal and Nepal are from a single institutions. Besides, the difference might be due to  
5 variation in socio-demographic, socioeconomic characteristics, and measurement tools used to quantify  
6 the level of satisfaction and sample size.  
7  
8  
9

10  
11 Regarding the subgroup analysis result, using study area, sample size and study year revealed that the  
12 highest level of women satisfaction with existing labor and delivery service was reported in Harari region,  
13 having a sample size of less than four hundred and among studies published between 2006-2010. This  
14 difference might be explained as due to number of studies conducted in Harari region and published in  
15 between 2006-2010 were limited than studies conducted and published in other regions of the country  
16 and published above 2010 years.  
17  
18  
19

20  
21 Women who have been seen by the health care provider within 20 minutes were a key determinant factor  
22 for women to be satisfied with the existing labor and delivery services. This finding is consistent with the  
23 stud done in Nepal (48). This might be due to that, being treated with dignity, respect, kindness,  
24 approachability and courtesy was a key interpersonal behavior which enhances women satisfaction.  
25  
26  
27

28  
29 Being able to maintain privacy is the important associated factor for women satisfaction with existing  
30 labor and delivery services. This study finding is supported by the study report from developing countries  
31 (49) and Uganda (50). This might be the fact that inadequate privacy during labor and delivery care and  
32 counseling was associated with women's poor perception of services.  
33  
34  
35

36  
37  
38 Absence of antenatal care follow up is one of the predictor for women satisfaction with existing labor and  
39 delivery care in this systematic review and meta-analysis. The probable reason might be that the exposure  
40 to facilities through antenatal care increases the understanding of women about the service provided by  
41 the health care professionals. This, in turn, demands enhanced healthcare services and better-quality labor  
42 care in the hospitals or health centers. The odds of having planned delivery in the health institution was  
43 nearly three times more likely to be satisfied with the labor and delivery services which provided in the  
44 institution. Women who had awareness and knowledge regarding facility delivery and its important may  
45 enhance the utilization and satisfaction towards the labor and delivery services. Indeed, clients had various  
46 expectations about hospital delivery that influenced their perception of care.  
47  
48  
49  
50  
51  
52  
53  
54  
55

1  
2  
3 Having informal education of the women were two times more likely to be satisfied with the existing and  
4 provided labor and delivery services in the health institutions. This finding is parallel with the study  
5 conducted in Uganda (50) and Serbia (51). This might be explained as women who had higher educational  
6 status, may expect high quality care of labor and delivery is provided which might be inconsistent due to  
7 limited number of health care professionals, availability of medications and the number of equipped  
8 health facilities which results low satisfaction among laboring women.  
9

10  
11  
12  
13  
14 The odds of receiving free service are the associated factor for women satisfaction with labor and delivery  
15 services. This might be due to providing available and accessible medications and medical resources with  
16 free service setting may significantly increase their satisfaction.  
17  
18

19  
20 Women whose labor is commenced within 12 hours are 2.7 times more likely to be satisfied by the labor  
21 and delivery services. This might be due to the fact that women whose labor persists beyond 12 hours  
22 were more prone to privacy breakage due to repeated pelvic examination, and persistent labor pain which  
23 results in dissatisfaction.  
24  
25  
26

## 27 28 **Conclusion**

29  
30 The pooled prevalence of women satisfaction with labor and delivery services was higher. Informal  
31 educational status of the women, Not having antenatal care follow up, planned delivery in the health  
32 institution, keeping women privacy, getting free service, time to be seen by the health care providers  
33 within 20 minutes and duration of labor within 12 hours were the associated factors of women's  
34 satisfaction with labor and delivery services. This finding is important to design strategic policies and  
35 interventions to prevent preventable maternal and neonatal complications during childbirth and  
36 postpartum period.  
37  
38  
39  
40

## 41 42 **Supporting information**

43 **Table S1.** MOOSE checklist: (PDF)

44 **Table S2.** Quality assessment tool: (PDF)

## 45 46 47 **List of Abbreviations**

48 AOR: Adjusted Odds Ratio, ANC: Antenatal Care, EDHS: Ethiopia Demographic Health Survey, MMR:  
49 Maternal Mortality Ratio, SVD: Spontaneous vaginal Delivery, WHO: World Health Organization  
50  
51  
52  
53  
54  
55

**Declarations****Funding**

Not applicable

**Availability of data and materials**

All related data has been presented within the manuscript. The dataset supporting the conclusions of this article is available from the authors on request.

**Author's Contributions**

AD and GG developed the draft protocol under the supervision of AW, AG, MB, and BA. All authors (AD, GG) critically reviewed, provided substantive feedback and contributed to the intellectual content of this paper and made substantial contributions to the conception, conceptualization and manuscript preparation of this systematic review. All authors read and approved the final manuscript.

**Authors' Information**

<sup>1</sup>Department of Nursing, College of Health Sciences, Woldia University, Woldia, Ethiopia, P.O.Box: 400.

<sup>2</sup>Department of Medical Laboratory Sciences, College of Health Sciences, Woldia University, Woldia, Ethiopia, P.O.Box: 400.

<sup>3</sup>Department of Midwifery, College of Health Sciences, Woldia University, Woldia, Ethiopia, P.O.Box: 400.

**Ethics approval and consent to participate**

Not applicable

**Consent for publication**

Not applicable.

**Competing interest**

All the authors declared that no competing interest exists

**Acknowledgement**

Not applicable

## References

1. WHO (World Health Organization). True magnitude of stillbirths, maternal and neonatal deaths are underreported. World health organization, Geneva, Switzerland. 2016.
2. WHO, UNICEF. Trends in maternal mortality and morbidity, 1990-2010, WHO, UNICEF, UNFPA and The World Bank estimates. 2012.
3. Lawn JE, Cousens S, Zupan J. 4 million neonatal deaths: When? Where? Why? *The Lancet*. 2005; 365(9462):891-900.
4. Paudel, Y. R., Aryal, K., Mehata, S., Paudel, D., Poudel, P., King, S., Dariang, M. and Barnett, S. Women's satisfaction of maternity care in Nepal and its correlation with intended future utilization. *International Journal of Reproductive Medicine*, 2015.
5. Rao KD, Peters DH, Bandeen-Roche K. Towards patient-centered health services in India—a scale to measure patient perceptions of quality. *International Journal for Quality in Health Care*. 2006; 18(6):414-21.
6. Chirdan O, Lar L, Afolaranmi T, Inalegwu E, Igoh C, Adah G. Client satisfaction with maternal health services comparism between public and private hospitals in Jos Nigeria. *Jos Journal of Medicine*. 2013; 7(1):1-9.
7. Matejic B, Milicevic MŠ, Vasic V, Djikanovic B. Maternal satisfaction with organized perinatal care in Serbian public hospitals. *BMC pregnancy and childbirth*. 2014; 14(1):14.
8. Srivastava A, Avan BI, Rajbangshi P, Bhattacharyya S. Determinants of women's satisfaction with maternal health care: a review of literature from developing countries. *BMC pregnancy and childbirth*. 2015; 15(1):97.
9. WHO. Standards for Maternal and Neonatal Care. Geneva: World Health Organization (WHO) Multicentre Growth Reference Study Group. 2006. WHO Child Growth Standards: Length/Height-for-Age, Weight-for-Age, Weight-for-Height and Body Mass Index-for Age: Methods and Development. Geneva, Switzerland: WHO. 2006.
10. ICF EPHI. Ethiopia Mini Demographic and Health Survey 2019: Key Indicators. Rockville, Maryland, USA: EPHI and ICF: <https://www.unicef.org/ethiopia/media/1721/file/The%202019%20Ethiopia%20Mini%20Demographic%20and%20Health%20Survey%20.pdf>. accessed on August/2019.



11. UN. United Nations Transforming our world, the 2030 Agenda for Sustainable Development. 2015.
12. World Health Organization. UNICEF, WHO, World Bank, United Nations Population Division. The Inter-agency Group for Child Mortality Estimation (UN IGME). Levels and Trends in Child Mortality. Report 2015. New York, USA: UNICEF; 2015.
13. Central Statistical Agency (CSA) and ICF. Ethiopia Demographic and Health Survey. Addis Ababa, Ethiopia, and Rockville, Maryland, USA: CSA and ICF, 2016.
14. Mofed, M. O. F. A. E. D. 2010. Trends and Prospects for Meeting MDGs by 2015.
15. Jha, P., Larsson, M., Christensson, K. & Skoog Svanberg, A. Satisfaction with childbirth services provided in public health facilities: results from a cross-sectional survey among postnatal women in Chhattisgarh, India. *Glob Health Action*, 2017;10, 1386932.
16. Sika Avotri, G., Beke, A. & Abekah-Nkrumah, G. Predictors of satisfaction with child birth services in public hospitals in Ghana. *International journal of health care quality assurance*, 2011;24, 223-237.
17. Srivastava, A., Avan, B. I., Rajbangshi, P. & Bhattacharyya, S. Determinants of women's satisfaction with maternal health care: a review of literature from developing countries. *BMC pregnancy and childbirth*, 2015:15-97.
18. Chirdan, O., Lar, L., Afolaranmi, T., Inalegwu, E., Igoh, C. & Adah, G. Client satisfaction with maternal health services comparisons between public and private hospitals in Jos Nigeria. *Jos Journal of Medicine*, 2013;7, 1-9.
19. Bazant E, Koenig M. Women's satisfaction with delivery care in Nairobi's informal settlements. *International Journal for Quality in Health Care*. 2009; 21(2):79-86.
20. WHO. World Health Organization recommendations on antenatal care for a positive pregnancy experience, [http://apps.who.int/iris/bitstream/10665/250796/1/9789241549912](http://apps.who.int/iris/bitstream/10665/250796/1/9789241549912-eng) -eng, 2016.
21. Downes MJ, Brennan ML, Williams HC, Dean RS. Development of a critical appraisal tool to assess the quality of cross-sectional studies (AXIS). *BMJ open*. 2016; 6(12):e011458.
22. McHugh M.L. Interrater reliability: the kappa statistic; *Biochemia Medica* 2012;22(3):276-82
23. Rücker G, Schwarzer G, Carpenter JR, Schumacher M. Undue reliance on I<sup>2</sup> in assessing heterogeneity may mislead. *BMC medical research methodology*. 2008; 8:79.
24. Nyaga VN, Arbyn M, Aerts M. Metaprop: a Stata command to perform meta-analysis of binomial data. *Archives of Public Health*. 2014; 72(1):39.

- 1  
2  
3 25. Duval, S., and R. L. Tweedie. 2000a. Trim and fill: A simple funnel-plot-based method of testing  
4 and adjusting for publication bias in meta-analysis. *Biometrics* 56: 455–463  
5  
6  
7 26. Gizaw Dessie Asres. Satisfaction of maternal care among women delivered at Asrade Zewude  
8 Memorial Primary Hospital, Bure, West Gojjam, Amhara, Ethiopia: A cross sectional study. *J. Public  
9 Health Epidemiol*  
10  
11  
12 27. Getenet et al. Women's satisfaction with intrapartum care and its predictors at harar hospitals,  
13 eastern Ethiopia: a cross-sectional study. *Nursing: research and reviews* 2019:9.  
14  
15 28. Temamo AA, Abebe A, Menta AA (2018) Mothers' Satisfaction with Institutional Delivery Service  
16 and Associated Factors among Women Attending Hospitals in Wolaita Zone Administration,  
17 SNNPR, Ethiopia. *J Nutr Diet Pract* 2: 001-012.  
18  
19 29. Edaso AU, Teshome GS. Mothers' satisfaction with delivery services and associated factors at  
20 health institutions in west Arsi, Oromia regional state, Ethiopia. *MOJ Womens Health*. 2019;  
21 8(1):110–119. DOI: 10.15406/mojwh.2019.08.00222  
22  
23 30. Gashaye KT, Tsegaye AT, Shiferaw G, Worku AG, Abebe SM (2019) Client satisfaction with existing  
24 labor and delivery care and associated factors among mothers who gave birth in university of  
25 Gondar teaching hospital; Northwest Ethiopia: Institution based cross-sectional study. *PLoS ONE*  
26 14(2): e0210693  
27  
28 31. Yarinbab TE, Ambo WA, Regea T, G/Mariam A (2019) Level of Maternal Satisfaction and its  
29 Determinants at Health Facilities in Mizan-Aman Town, Ethiopia: Cross Sectional Study. *Int J  
30 Womens Health Wellness* 5:088  
31  
32 32. Demas et al. Women's satisfaction with intrapartum care in St Paul's Hospital Millennium Medical  
33 College Addis Ababa Ethiopia: a cross sectional study *BMC Pregnancy and Childbirth* (2017)  
34 17:253  
35  
36 33. Kurabachew Bitew et al. Maternal Satisfaction on Delivery Service and Its Associated Factors  
37 among Mothers Who Gave Birth in Public Health Facilities of Debre Markos Town, Northwest  
38 Ethiopia. *BioMed Research International* Volume 2015  
39  
40 34. Addisalem Kidane. Maternal satisfaction and associated factors towards delivery service among  
41 mothers who gave birth at public hospitals in harar city, eastern Ethiopia. MSc dissertation  
42 haramaya university repository  
43  
44 35. Tadele Melese et al. Assessment of client satisfaction in labor and delivery services at a maternity  
45 referral hospital in Ethiopia. *Pan African Medical Journal*. 2014; 17:76  
46  
47  
48  
49  
50  
51  
52  
53  
54  
55

- 1  
2  
3  
4  
5  
6  
7  
8  
9  
10  
11  
12  
13  
14  
15  
16  
17  
18  
19  
20  
21  
22  
23  
24  
25  
26  
27  
28  
29  
30  
31  
32  
33  
34  
35  
36  
37  
38  
39  
40  
41  
42  
43  
44  
45  
46  
47  
48  
49  
50  
51  
52  
53  
54  
55  
56  
57  
58  
59  
60
36. Gonie A, Tebeje B, Sinaga M (2018) Satisfaction towards Skilled Delivery Services and Associated Factors among Mothers who Gave Birth at Government Health Facilities, Jimma Town, Ethiopia. *Clinics Mother Child Health* 15: 302. doi:10.4172/2090-7214.1000302
  37. Tayelgn et al. Mothers' satisfaction with referral hospital delivery service in Amhara Region, Ethiopia. *BMC pregnancy and childbirth*. 2011, 11:78
  38. Dewana et al. Client perspective assessment of women's satisfaction towards labour and delivery care service in public health facilities at Arba Minch town and the surrounding district, Gamo Gofa zone, south Ethiopia. *Reproductive health* (2016) 13:11
  39. Rahel Tesfaye et al. Client Satisfaction with Delivery Care Service and Associated Factors in the Public Health Facilities of Gamo Gofa Zone, Southwest Ethiopia: *In a Resource Limited Setting*. *Obstetrics and Gynecology International* Volume 2016
  40. Mekonnenet al. Women's satisfaction with childbirth care in FelegeHiwot Referral Hospital, Bahir Dar city, Northwest Ethiopia, 2014: cross sectional study. *BMC Res Notes* (2015) 8:528
  41. Amdemichael R, Tafa M, Fekadu H (2014) Maternal Satisfaction with the Delivery Services in Assela Hospital, Arsi Zone, Oromia Region. *GynecolObstet (Sunnyvale)* 4: 257. doi:10.4172/2161-0932.1000257
  42. Biniyam Haile Tadesse, NegalignBirhanu Bayou, Gebeyehu Tsega Nebeb. Mothers' Satisfaction with Institutional Delivery Service in Public Health Facilities of Omo Nada District, Jimma Zone. *Clinical Medicine Research*. Vol. 6, No. 1, 2017, pp. 2330. doi: 10.11648/j.cmr.20170601.13
  43. Blen Assefa. Maternal satisfaction with delivery services of public health centers in Addis Ababa, Ethiopia, 2017. MSc dissertation Addis Ababa university repository.
  44. Demis eta al. maternal satisfaction towards intrapartum nursing care at north wollo public health institutions in Ethiopia.
  45. ParidhiJha, Margareta Larsson, Kyllike Christensson& AgnetaSkoog Svanberg (2017) Satisfaction with childbirth services provided in public health facilities: results from a cross- sectional survey among postnatal women in Chhattisgarh, India, *Global Health Action*, 10:1, 1386932
  46. Sayed W, ElAal DEM, Mohammed HS, Abbas AM, Zahran KM. Maternal satisfaction with delivery services at tertiary University hospital in Upper Egypt, is it actually satisfying? *Int J Reprod Contracept ObstetGynecol* 2018; 7:2547-52.

- 1  
2  
3  
4  
5  
6  
7  
8  
9  
10  
11  
12  
13  
14  
15  
16  
17  
18  
19  
20  
21  
22  
23  
24  
25  
26  
27  
28  
29  
30  
31  
32  
33  
34  
35  
36  
37  
38  
39  
40  
41  
42  
43  
44  
45  
46  
47  
48  
49  
50  
51  
52  
53  
54  
55  
56  
57  
58  
59  
60
47. Oikawa M, Sonko A, Faye E, Ndiaye P, Diadhiou M, Kondo M. Assessment of maternal satisfaction with facility-based childbirth care in the rural region of Tambacouda, Senegal. *Afr J Reprod Health*. 2014; 18(4):95.
48. Devi KumariSapkota, Mathura Sapkota, BishnuKumari Shrestha. Mothers' satisfaction on maternitycare services in bharatpur hospitalchitwan, Nepal. *International Journal of Scientific and Research Publications*, Volume 8, Issue 9, September 2018
49. Srivastava et al. Determinants of women's satisfaction with maternal health care: a review of literature from developing countries. *BMC Pregnancy and Childbirth* (2015) 15:97
50. Kigenyi et al. Quality of intrapartum care at Mulago national referral hospital, Uganda: clients' perspective *BMC Pregnancy and Childbirth* 2013, 13:162
51. Matejić B, Milićević Milena Šantrić, Vasić V, Djikanović B. Maternal satisfaction with organized perinatal care in Serbian public hospitals. *BMC Pregnancy Childbirth*. 2014; 14(1):14:14.

### Legend of figures

Figure 1: Flow chart of study selection for systematic review and meta-analysis of women satisfaction with labor and delivery services and its associated factors in Ethiopia

Figure 2: Forest plot of the prevalence with corresponding 95% CIs of the nineteen studies on women satisfaction with labor and delivery services in Ethiopia

Figure 3: Funnel plot before adjustment (a) and after adjustment (b) trim and fill analysis

Figure 4: Pooled odds ratio of the association between educational status and satisfaction of women with labor and delivery services in Ethiopia

Figure 5: Pooled odds ratio of the association between antenatal care and satisfaction of women with labor and delivery services in Ethiopia

Figure 6: Pooled odds ratio of the association between planned pregnancy and satisfaction of women with labor and delivery services in Ethiopia

Figure 7: Pooled odds ratio of the association between time to be seen by health care provider and satisfaction of women with labor and delivery services in Ethiopia

Figure 8: Pooled odds ratio of the association between privacy of the mother and satisfaction of women with labor and delivery services in Ethiopia

Figure 9: Pooled odds ratio of the association between duration of labor and satisfaction of women with labor and delivery services in Ethiopia

Figure 10: Pooled odds ratio of the association between getting free service and satisfaction of women with labor and delivery services in Ethiopia

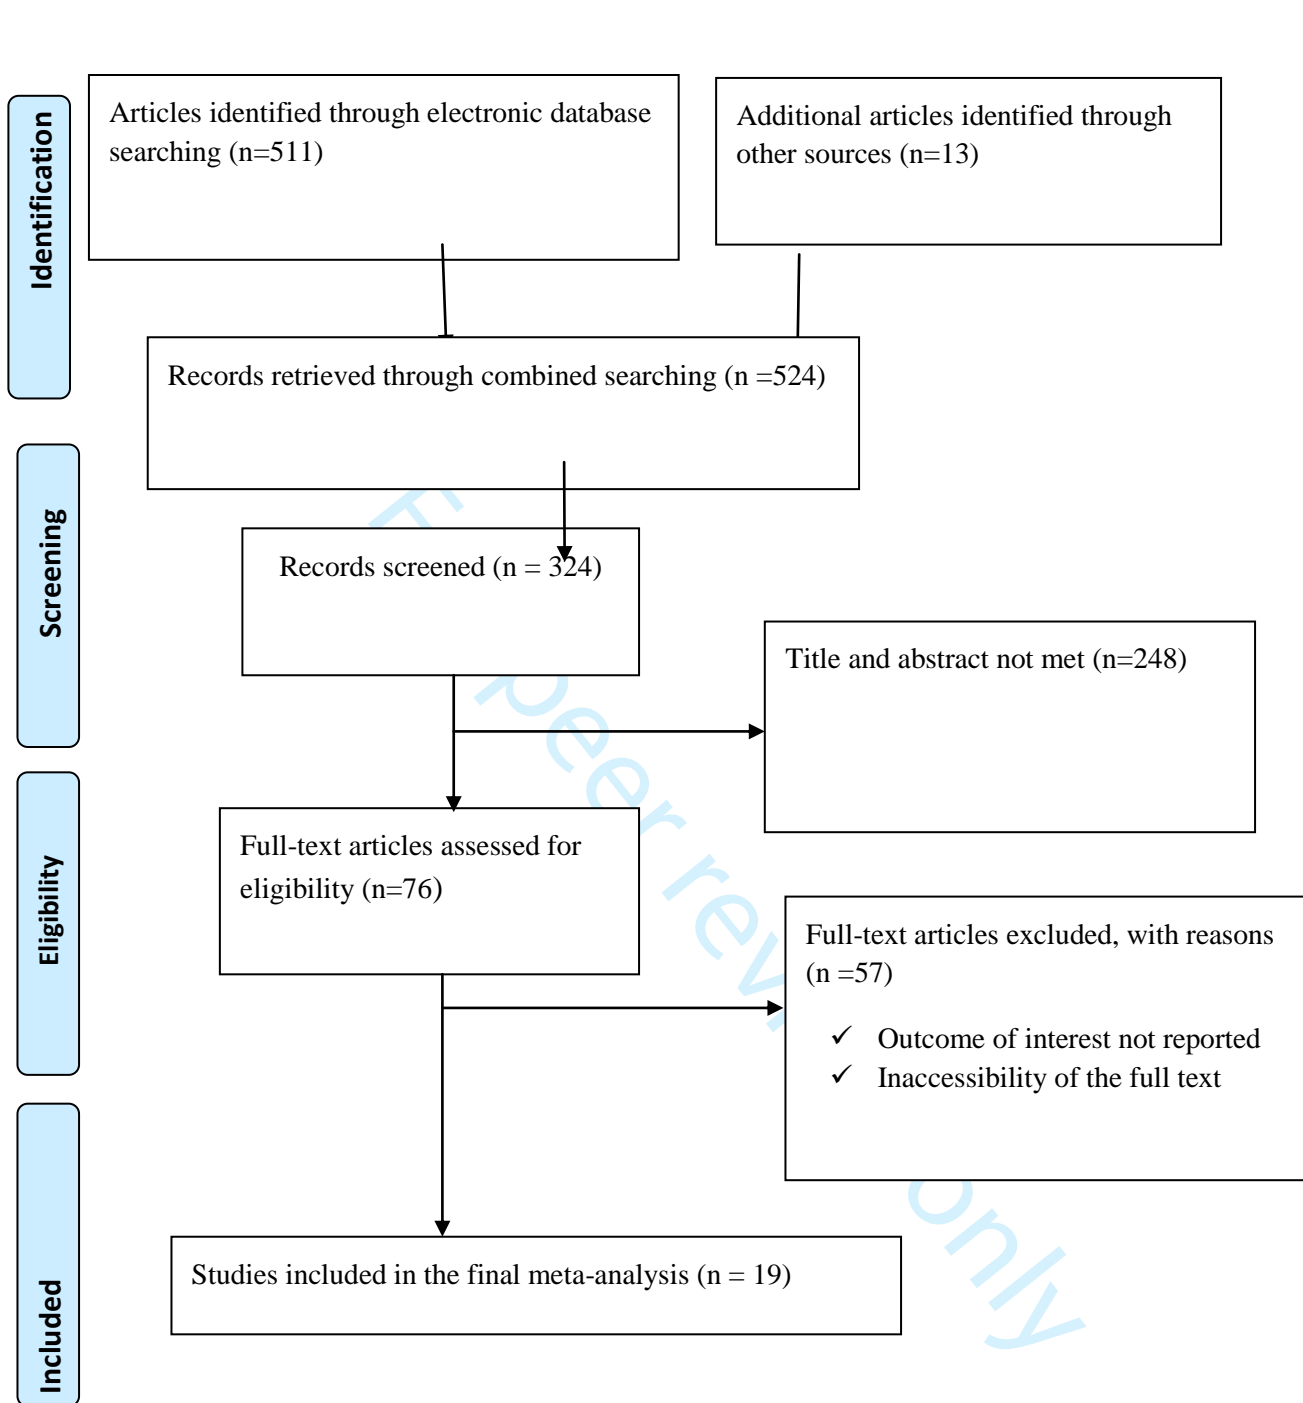

1  
2  
3  
4  
5  
6  
7  
8  
9  
10  
11  
12  
13  
14  
15  
16  
17  
18  
19  
20  
21  
22  
23  
24  
25  
26  
27  
28  
29  
30  
31  
32  
33  
34  
35  
36  
37  
38  
39  
40  
41  
42  
43  
44  
45  
46  
47  
48  
49  
50  
51  
52  
53  
54  
55  
56  
57  
58  
59  
60

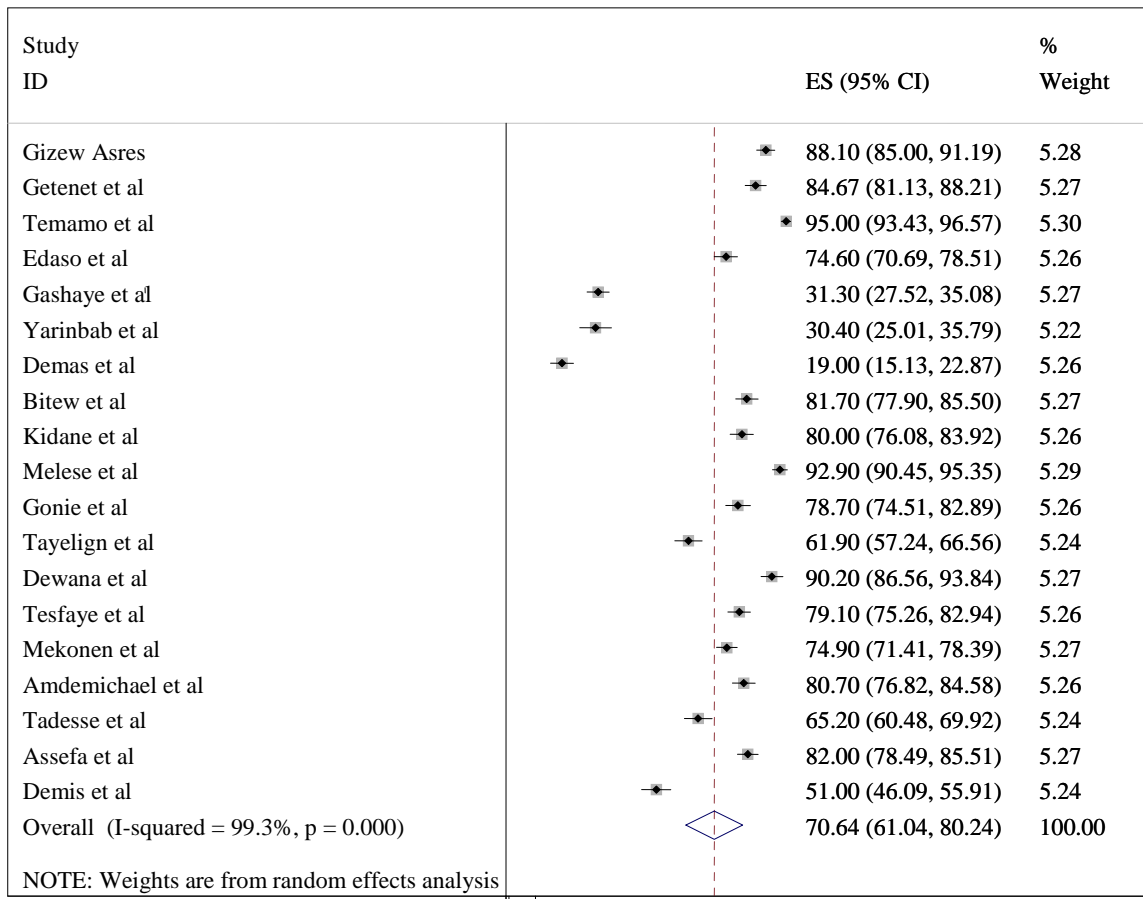

0 10

For peer review only

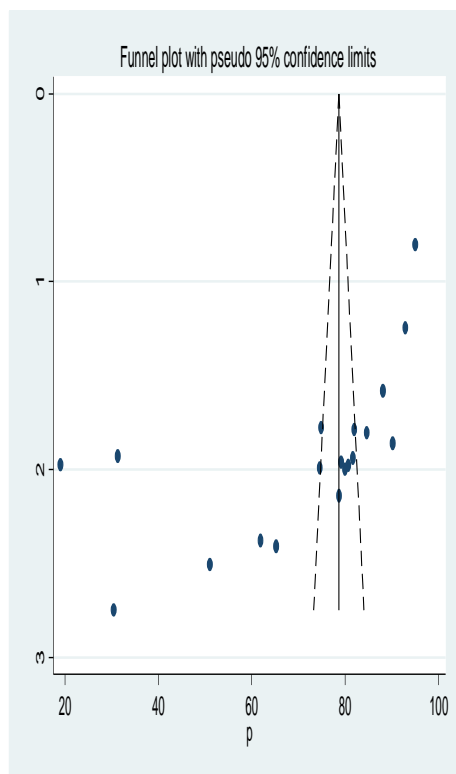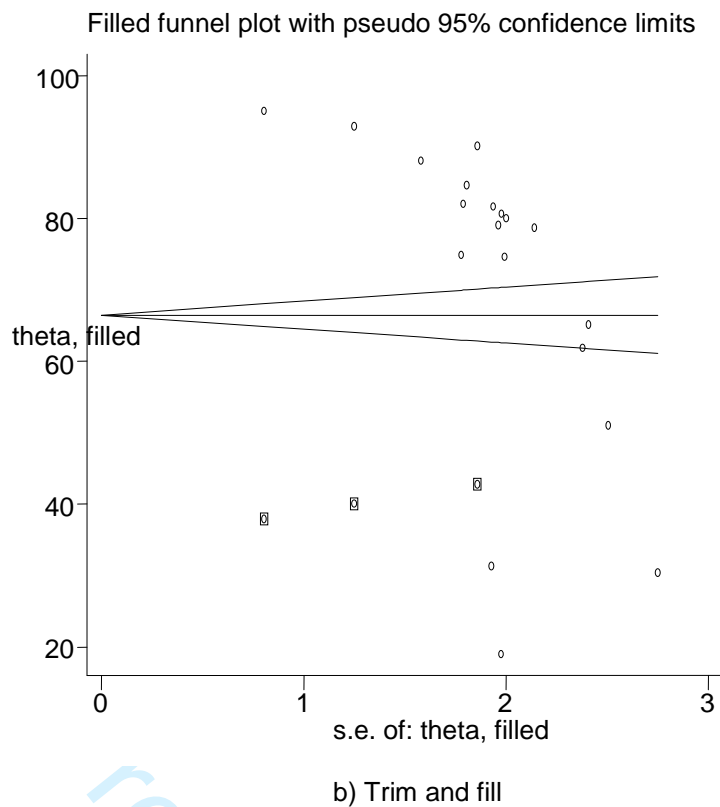

review only



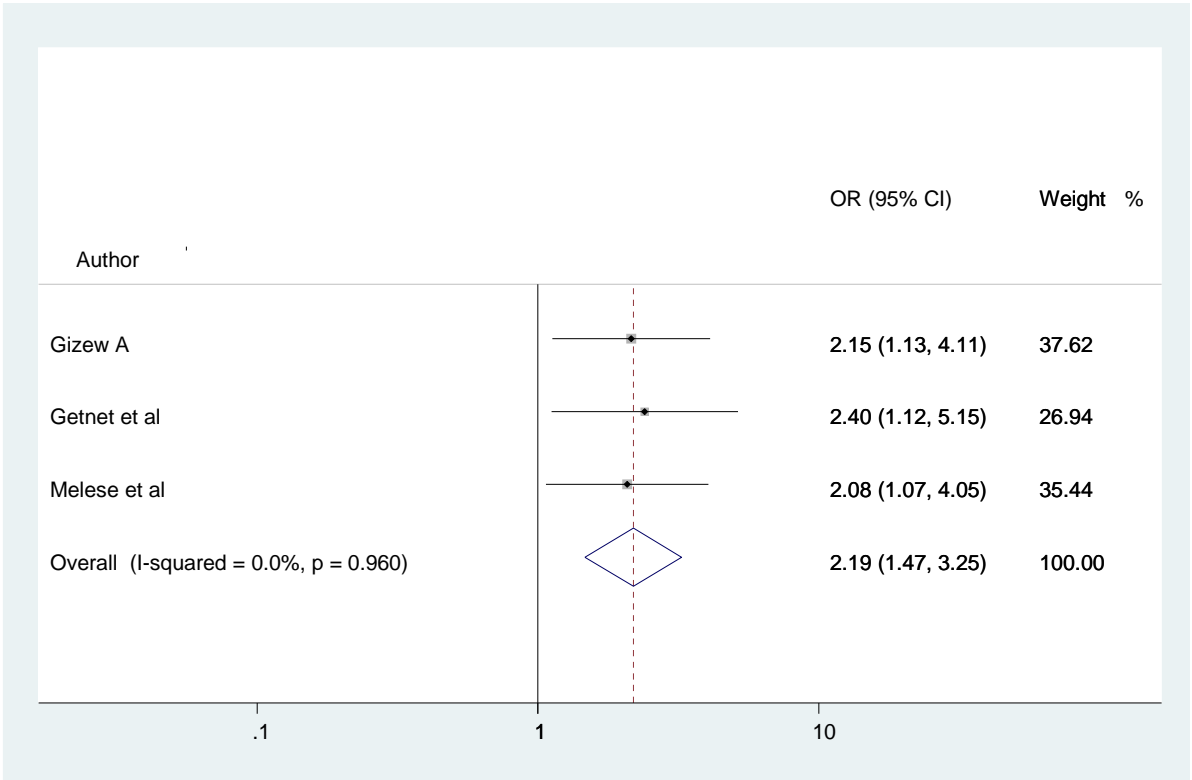

For peer review only

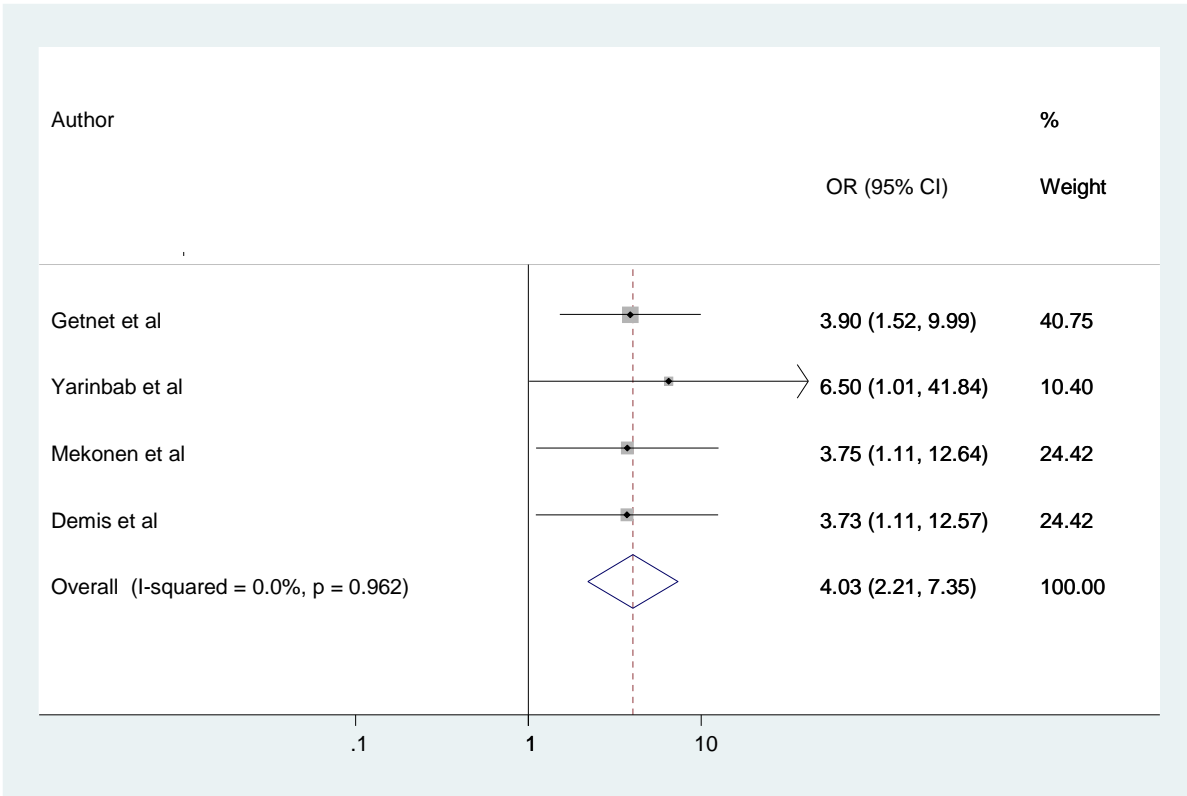

For peer review only

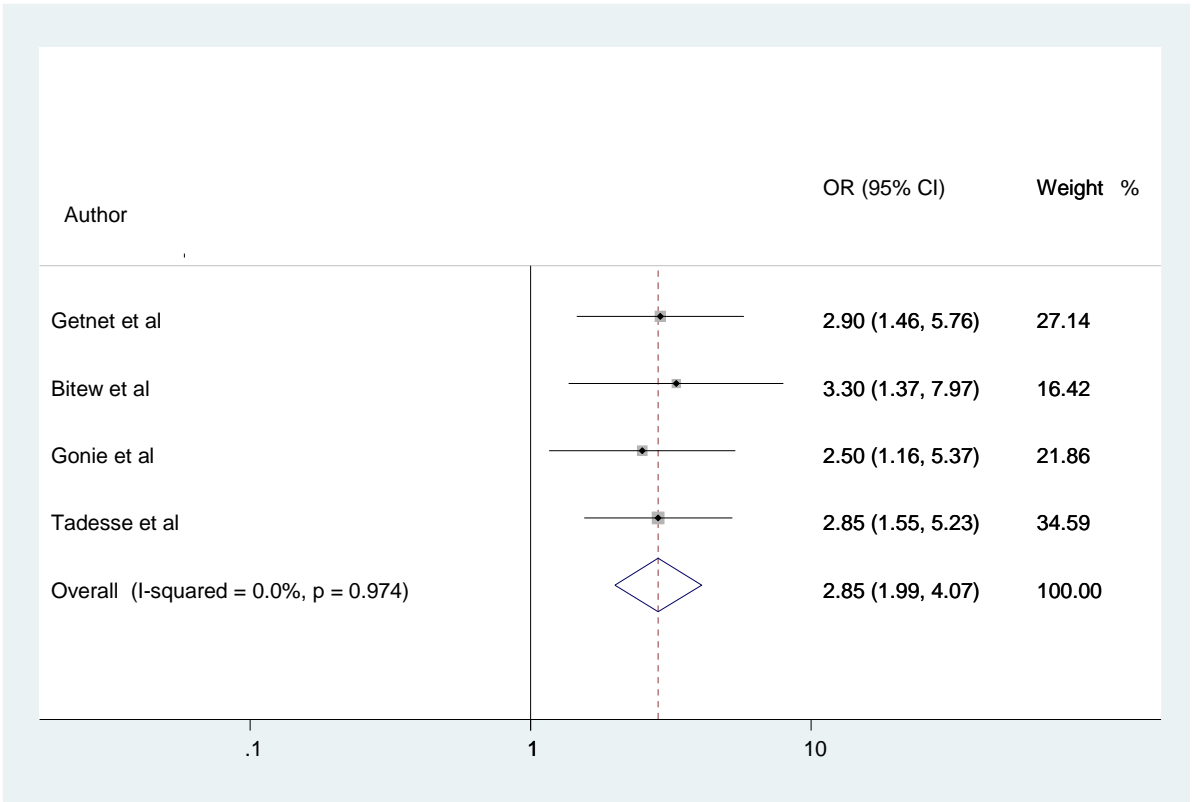

review only

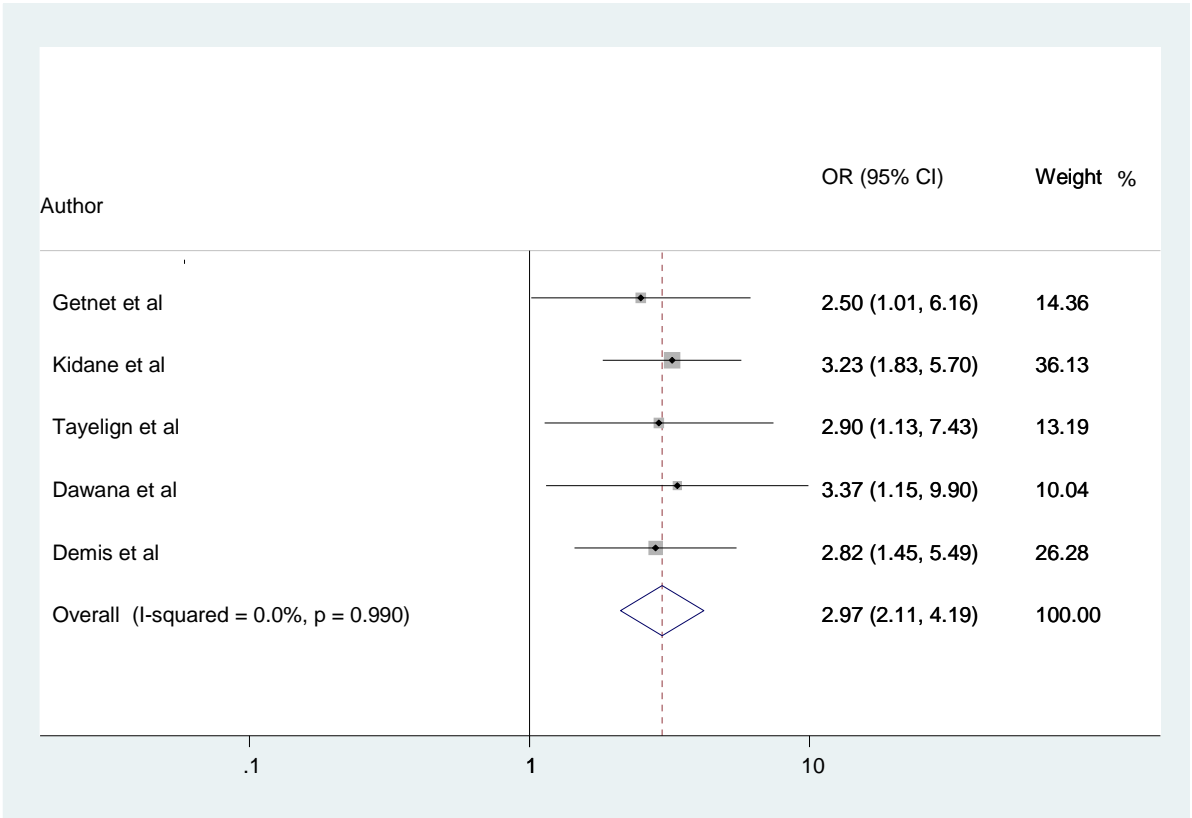

review only

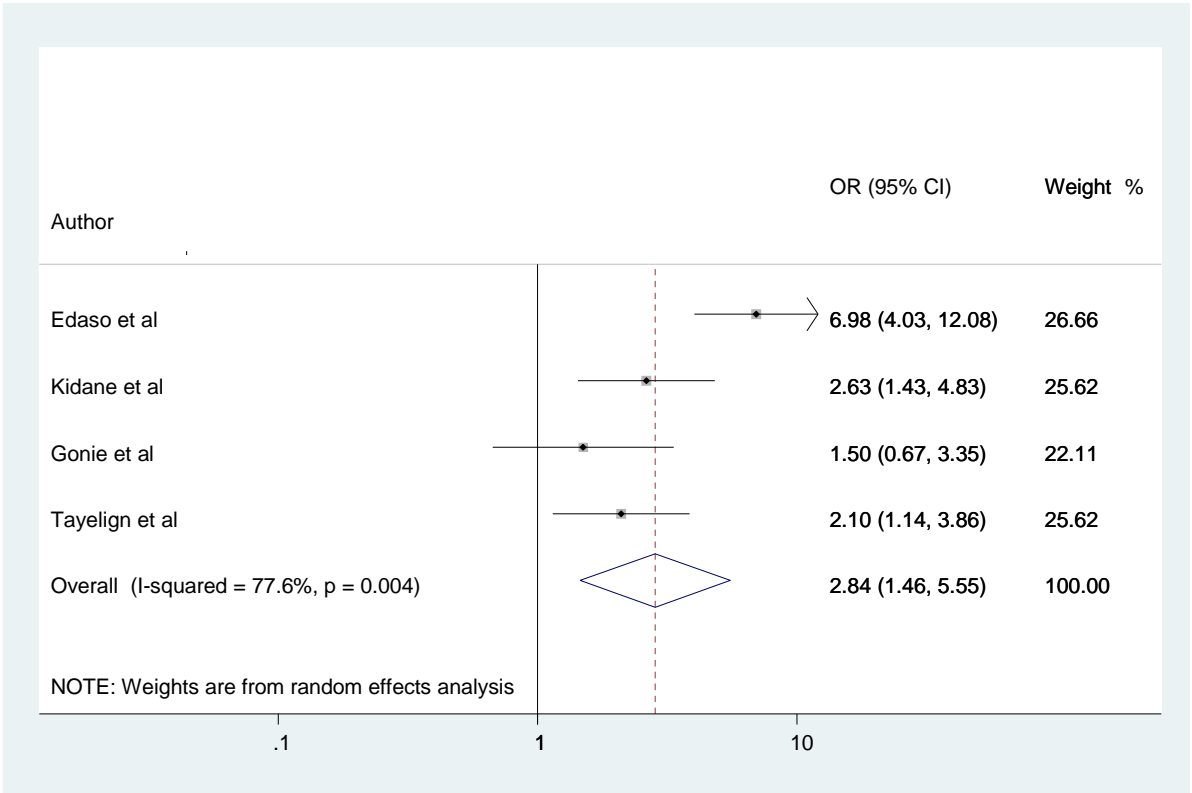

For peer review only

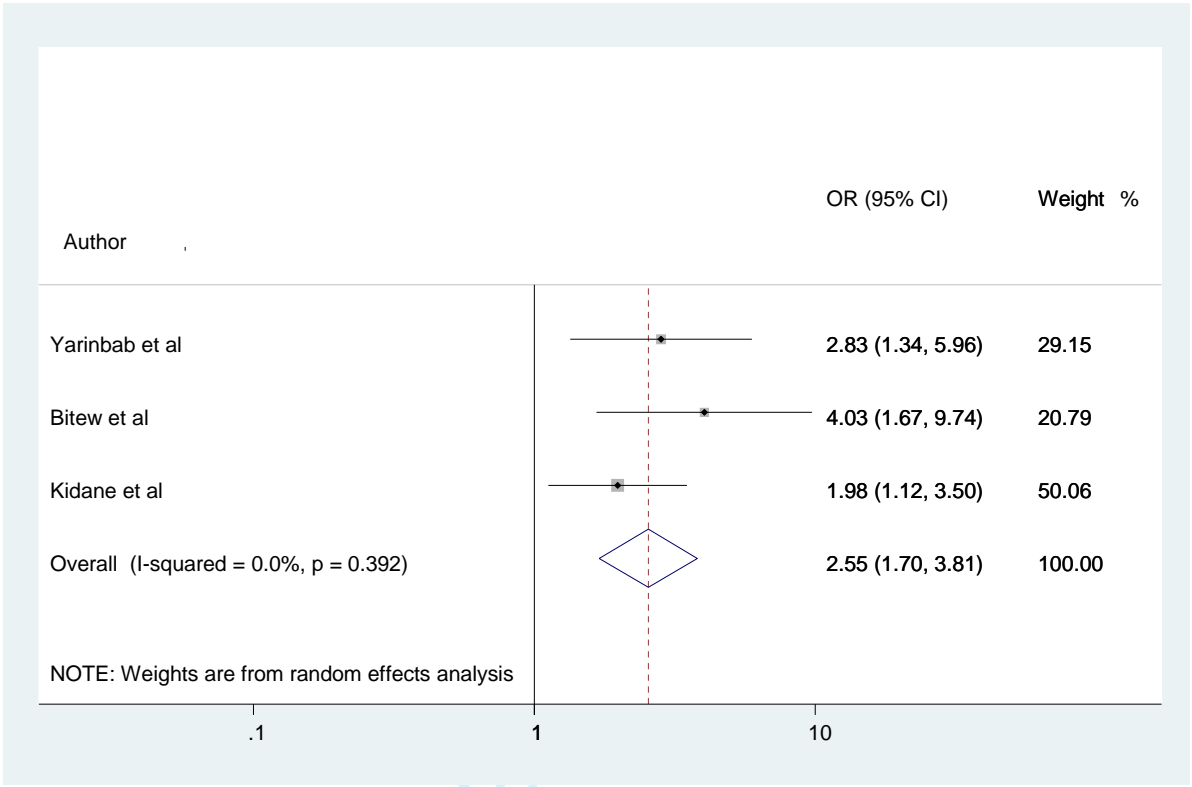

Peer review only

1  
2  
3  
4  
5  
6  
7  
8  
9  
10  
11  
12  
13  
14  
15  
16  
17  
18  
19  
20  
21  
22  
23  
24  
25  
26  
27  
28  
29  
30  
31  
32  
33  
34  
35  
36  
37  
38  
39  
40  
41  
42  
43  
44  
45  
46  
47  
48  
49  
50  
51  
52  
53  
54  
55  
56  
57  
58  
59  
60

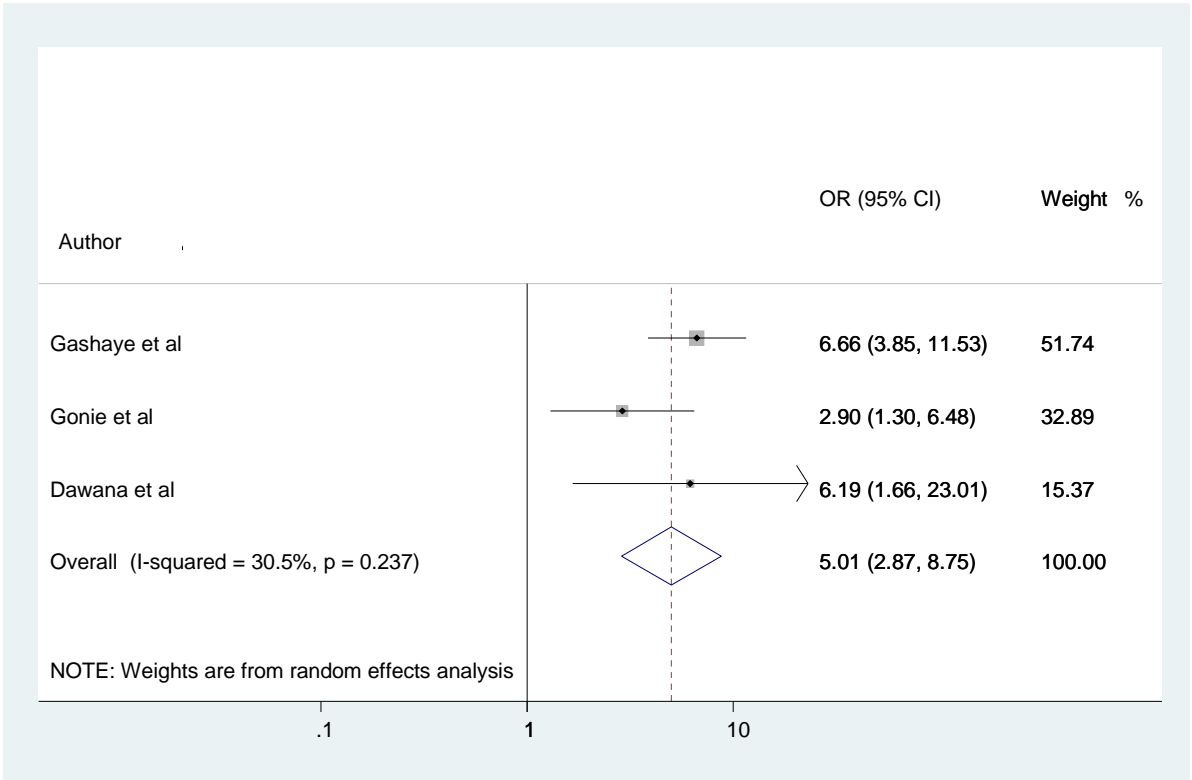

er review only

## MOOSE Guidelines for Meta-Analyses and Systematic Reviews of Observational Studies\*

|                                                                         | Topic                                                                                                                                                                                                                                                         | Page number    |
|-------------------------------------------------------------------------|---------------------------------------------------------------------------------------------------------------------------------------------------------------------------------------------------------------------------------------------------------------|----------------|
| <b>Title</b>                                                            | Identify the study as a meta-analysis (or systematic review)                                                                                                                                                                                                  |                |
| <b>Abstract</b>                                                         | Use the journal's structured format                                                                                                                                                                                                                           |                |
| <b>Introduction</b>                                                     | <b>Present:</b>                                                                                                                                                                                                                                               |                |
|                                                                         | The clinical problem                                                                                                                                                                                                                                          |                |
|                                                                         | The hypothesis                                                                                                                                                                                                                                                |                |
|                                                                         | A statement of objectives that includes the study population, the condition of interest, the exposure or intervention, and the outcome(s) considered                                                                                                          |                |
| <b>Sources</b>                                                          | <b>Describe:</b>                                                                                                                                                                                                                                              |                |
|                                                                         | Qualifications of searchers (eg, librarians and investigators)                                                                                                                                                                                                |                |
|                                                                         | Search strategy, including time period included in the synthesis and keywords                                                                                                                                                                                 |                |
|                                                                         | Effort to include all available studies, including contact with authors                                                                                                                                                                                       |                |
|                                                                         | Databases and registries searched                                                                                                                                                                                                                             |                |
|                                                                         | Search software used, name and version, including special features used (e.g. explosion)                                                                                                                                                                      |                |
|                                                                         | Use of hand searching (e.g. reference lists of obtained articles)                                                                                                                                                                                             |                |
|                                                                         | List of citations located and those excluded, including justification                                                                                                                                                                                         |                |
|                                                                         | Method of addressing articles published in languages other than English                                                                                                                                                                                       |                |
|                                                                         | Method of handling abstracts and unpublished studies                                                                                                                                                                                                          |                |
|                                                                         | Description of any contact with authors                                                                                                                                                                                                                       |                |
| <b>Study Selection</b>                                                  | <b>Describe</b>                                                                                                                                                                                                                                               |                |
|                                                                         | Types of study designs considered                                                                                                                                                                                                                             |                |
|                                                                         | Relevance or appropriateness of studies gathered for assessing the hypothesis to be tested                                                                                                                                                                    |                |
|                                                                         | Rationale for the selection and coding of data (eg, sound clinical principles or convenience)                                                                                                                                                                 |                |
|                                                                         | Documentation of how data were classified and coded (eg, multiple raters, blinding, and inter-rater reliability)                                                                                                                                              |                |
|                                                                         | Assessment of confounding (e.g. comparability of cases and controls in studies where appropriate)                                                                                                                                                             |                |
|                                                                         | Assessment of study quality, including blinding of quality assessors; stratification or regression on possible predictors of study results                                                                                                                    |                |
|                                                                         | Assessment of heterogeneity                                                                                                                                                                                                                                   |                |
|                                                                         | Statistical methods (eg, complete description of fixed or random effects models, justification of whether the chosen models account for predictors of study results, dose-response models, or cumulative meta-analysis) in sufficient detail to be replicated |                |
|                                                                         | <b>Results</b>                                                                                                                                                                                                                                                | <b>Present</b> |
| A graph summarizing individual study estimates and the overall estimate |                                                                                                                                                                                                                                                               |                |
| A table giving descriptive information for each included study          |                                                                                                                                                                                                                                                               |                |
| Results of sensitivity testing (eg, subgroup analysis)                  |                                                                                                                                                                                                                                                               |                |
| Indication of statistical uncertainty of findings                       |                                                                                                                                                                                                                                                               |                |
| <b>Discussion</b>                                                       | <b>Discuss</b>                                                                                                                                                                                                                                                |                |
|                                                                         | Strengths and weaknesses                                                                                                                                                                                                                                      |                |
|                                                                         | Potential biases in the review process (eg, publication bias)                                                                                                                                                                                                 |                |



|   |                                                                                                                           |  |
|---|---------------------------------------------------------------------------------------------------------------------------|--|
|   | Assessment of quality of included studies                                                                                 |  |
| 1 |                                                                                                                           |  |
| 2 | Consideration of alternative explanations for observed results                                                            |  |
| 3 |                                                                                                                           |  |
| 4 | Generalization of the conclusions (ie, appropriate for the data presented and within the domain of the literature review) |  |
| 5 |                                                                                                                           |  |
| 6 | Guidelines for future research                                                                                            |  |
| 7 |                                                                                                                           |  |
| 8 | Disclosure of funding source                                                                                              |  |

\*Modified from Stroup DF, Berlin JA, Morton SC, Olkin I, Williamson GD, Rennie D, et al. Meta-analysis of observational studies in epidemiology: a proposal for reporting. Meta-analysis Of Observational Studies in Epidemiology (MOOSE) group. JAMA 2000;283:2008–12. Copyrighted © 2000, American Medical Association. All rights reserved.

## Quality assessment of articles (NOS for cross sectional study)

| Studies             | Selection                 |                    |                        |                                                    | Comparability | Outcome                                                                                                                                |                                  | Total score |
|---------------------|---------------------------|--------------------|------------------------|----------------------------------------------------|---------------|----------------------------------------------------------------------------------------------------------------------------------------|----------------------------------|-------------|
|                     | Representativeness<br>(1) | Sample size<br>(1) | Non-respondents<br>(1) | Ascertainment of the exposure (risk factor)<br>(2) |               | The subjects in different outcome groups are comparable, based on the study design or analysis. Confounding factors are controlled (2) | Assessment of the outcome<br>(2) |             |
| Gizew Asres (26)    | *                         | *                  | *                      | **                                                 | *             | **                                                                                                                                     | *                                | 9           |
| Getenet et al (27)  | *                         | *                  | *                      | **                                                 | *             | *                                                                                                                                      | *                                | 8           |
| Temamo et al (28)   | *                         | *                  | *                      | **                                                 | *             | **                                                                                                                                     | *                                | 9           |
| Edaso et al (29)    | *                         | *                  | *                      | *                                                  | *             | **                                                                                                                                     | *                                | 8           |
| Gashaye et al (30)  | *                         | *                  | *                      | **                                                 | *             | **                                                                                                                                     | *                                | 9           |
| Yarinbab et al (31) | *                         | *                  | *                      | **                                                 | *             | **                                                                                                                                     | *                                | 9           |
| Demas et al (32)    | *                         | *                  | *                      | **                                                 | *             | **                                                                                                                                     | *                                | 9           |
| Bitew et al (33)    | *                         | *                  | *                      | **                                                 | *             | **                                                                                                                                     | *                                | 9           |
| Kidane et al (34)   | *                         | *                  | *                      | **                                                 | *             | **                                                                                                                                     | *                                | 9           |
| Melese et al (35)   | *                         | *                  | *                      | **                                                 | *             | **                                                                                                                                     | *                                | 9           |
| Gonie et al (36)    | *                         | *                  | *                      | *                                                  | *             | *                                                                                                                                      | *                                | 7           |
| Tayelign et al (37) | *                         | *                  | *                      | **                                                 | *             | **                                                                                                                                     | *                                | 8           |
| Dewana et al (38)   | *                         | *                  | *                      | **                                                 | *             | **                                                                                                                                     | *                                | 9           |
| Tesfaye et al (39)  | *                         | *                  | *                      | **                                                 | *             | *                                                                                                                                      | *                                | 8           |
| Mekonen et al (40)  | *                         | *                  | *                      | *                                                  | *             | **                                                                                                                                     | *                                | 8           |

1  
2  
3  
4  
5  
6  
7  
8  
9  
10  
11  
12  
13  
14  
15  
16  
17  
18  
19  
20  
21  
22  
23  
24  
25  
26  
27  
28  
29  
30  
31  
32  
33  
34  
35  
36  
37  
38  
39  
40  
41  
42  
43  
44  
45  
46

|                        |   |   |   |    |   |    |   |   |
|------------------------|---|---|---|----|---|----|---|---|
| Amdemichael et al (41) | * | * | * | ** | * | *  | * | 8 |
| Tadesse et al (42)     | * | * | * | ** | * | ** | * | 9 |
| Assefa et al (43)      | * | * | * | *  | * | ** | * | 8 |
| Demis et al (44)       | * | * | * | ** | * | ** | * | 9 |

For peer review only
