# Supplementary material for: Women’s satisfaction with existing labour and delivery services in Ethiopia: a systematic review and meta-analysis
Source: PubMed Central journal article supplement — BMJ Open. 2020 Jul 23;10(7):e036552. doi: 10.1136/bmjopen-2019-036552 (PMC7380852; doi:10.1136/bmjopen-2019-036552), 2020-07-23
Supplement: bmjopen-2019-036552supp001.pdf [file bmjopen-2019-036552supp001.pdf]

## MOOSE Guidelines for Meta-Analyses and Systematic Reviews of Observational Studies\*

|                        | Topic                                                                                                                                                                                                                                                         | Page number |
|------------------------|---------------------------------------------------------------------------------------------------------------------------------------------------------------------------------------------------------------------------------------------------------------|-------------|
|                        |                                                                                                                                                                                                                                                               | 01          |
| <b>Title</b>           | Identify the study as a meta-analysis (or systematic review)                                                                                                                                                                                                  | 02          |
| <b>Abstract</b>        | Use the journal's structured format                                                                                                                                                                                                                           | 03          |
| <b>Introduction</b>    | <b>Present:</b>                                                                                                                                                                                                                                               | 04          |
|                        | The clinical problem                                                                                                                                                                                                                                          | 05          |
|                        | The hypothesis                                                                                                                                                                                                                                                | 05          |
|                        | A statement of objectives that includes the study population, the condition of interest, the exposure or intervention, and the outcome(s) considered                                                                                                          | 05          |
| <b>Sources</b>         | <b>Describe:</b>                                                                                                                                                                                                                                              | 05          |
|                        | Qualifications of searchers (eg, librarians and investigators)                                                                                                                                                                                                | 05-06       |
|                        | Search strategy, including time period included in the synthesis and keywords                                                                                                                                                                                 | 05-06       |
|                        | Effort to include all available studies, including contact with authors                                                                                                                                                                                       | 05-06       |
|                        | Databases and registries searched                                                                                                                                                                                                                             | 05-06       |
|                        | Search software used, name and version, including special features used (e.g. explosion)                                                                                                                                                                      | 05-06       |
|                        | Use of hand searching (e.g. reference lists of obtained articles)                                                                                                                                                                                             | 05-06       |
|                        | List of citations located and those excluded, including justification                                                                                                                                                                                         | 06          |
|                        | Method of addressing articles published in languages other than English                                                                                                                                                                                       | 06          |
|                        | Method of handling abstracts and unpublished studies                                                                                                                                                                                                          | 06          |
|                        | Description of any contact with authors                                                                                                                                                                                                                       | N/A         |
| <b>Study Selection</b> | <b>Describe</b>                                                                                                                                                                                                                                               | 06          |
|                        | Types of study designs considered                                                                                                                                                                                                                             | 06          |
|                        | Relevance or appropriateness of studies gathered for assessing the hypothesis to be tested                                                                                                                                                                    | 06          |
|                        | Rationale for the selection and coding of data (eg, sound clinical principles or convenience)                                                                                                                                                                 | 06          |
|                        | Documentation of how data were classified and coded (eg, multiple raters, blinding, and inter-rater reliability)                                                                                                                                              | 07-08       |
|                        | Assessment of confounding (e.g. comparability of cases and controls in studies where appropriate)                                                                                                                                                             | N/A         |
|                        | Assessment of study quality, including blinding of quality assessors; stratification or regression on possible predictors of study results                                                                                                                    | 07-08       |
|                        | Assessment of heterogeneity                                                                                                                                                                                                                                   | 07-08       |
|                        | Statistical methods (eg, complete description of fixed or random effects models, justification of whether the chosen models account for predictors of study results, dose-response models, or cumulative meta-analysis) in sufficient detail to be replicated | 07-08       |
|                        |                                                                                                                                                                                                                                                               |             |
| <b>Results</b>         | <b>Present</b>                                                                                                                                                                                                                                                |             |
|                        | A graph summarizing individual study estimates and the overall estimate                                                                                                                                                                                       | 09-14       |
|                        | A table giving descriptive information for each included study                                                                                                                                                                                                | 09-14       |
|                        | Results of sensitivity testing (eg, subgroup analysis)                                                                                                                                                                                                        | 09-14       |
|                        | Indication of statistical uncertainty of findings                                                                                                                                                                                                             | 09-14       |
| <b>Discussion</b>      | <b>Discuss</b>                                                                                                                                                                                                                                                | 9-10        |
|                        | Strengths and weaknesses                                                                                                                                                                                                                                      | 9-11        |
|                        | Potential biases in the review process (eg, publication bias)                                                                                                                                                                                                 | 13          |

3

10

|  |                                                                                                                           |               |
|--|---------------------------------------------------------------------------------------------------------------------------|---------------|
|  |                                                                                                                           | 10            |
|  |                                                                                                                           | 13-15         |
|  | Assessment of quality of included studies                                                                                 | <b>15</b>     |
|  | Consideration of alternative explanations for observed results                                                            | <del>15</del> |
|  | Generalization of the conclusions (ie, appropriate for the data presented and within the domain of the literature review) | <del>15</del> |
|  | Guidelines for future research                                                                                            | <del>15</del> |
|  | Disclosure of funding source                                                                                              |               |

\*Modified from Stroup DF, Berlin JA, Morton SC, Olkin I, Williamson GD, Rennie D, et al. Meta-analysis of observational studies in epidemiology: a proposal for reporting. Meta-analysis Of Observational Studies in Epidemiology (MOOSE) group. JAMA 2000;283:2008–12. Copyrighted © 2000, American Medical Association. All rights reserved.
