# Supplementary material for: Women’s satisfaction with existing labour and delivery services in Ethiopia: a systematic review and meta-analysis
Source: PubMed Central journal article supplement — BMJ Open. 2020 Jul 23;10(7):e036552. doi: 10.1136/bmjopen-2019-036552 (PMC7380852; doi:10.1136/bmjopen-2019-036552), 2020-07-23
Supplement: bmjopen-2019-036552supp002.pdf [file bmjopen-2019-036552supp002.pdf]

## Quality assessment of articles (NOS for cross sectional study)

| Studies             | Selection                 |                    |                        |                                                    | Comparability<br>The subjects in different outcome groups are comparable, based on the study design or analysis. Confounding factors are controlled (2) | Outcome                          |                         | Total score |
|---------------------|---------------------------|--------------------|------------------------|----------------------------------------------------|---------------------------------------------------------------------------------------------------------------------------------------------------------|----------------------------------|-------------------------|-------------|
|                     | Representativeness<br>(1) | Sample size<br>(1) | Non-respondents<br>(1) | Ascertainment of the exposure (risk factor)<br>(2) |                                                                                                                                                         | Assessment of the outcome<br>(2) | Statistical test<br>(1) |             |
| Gizew Asres (26)    | *                         | *                  | *                      | **                                                 | *                                                                                                                                                       | **                               | *                       | 9           |
| Getenet et al (27)  | *                         | *                  | *                      | **                                                 | *                                                                                                                                                       | *                                | *                       | 8           |
| Temamo et al (28)   | *                         | *                  | *                      | **                                                 | *                                                                                                                                                       | **                               | *                       | 9           |
| Edaso et al (29)    | *                         | *                  | *                      | *                                                  | *                                                                                                                                                       | **                               | *                       | 8           |
| Gashaye et al (30)  | *                         | *                  | *                      | **                                                 | *                                                                                                                                                       | **                               | *                       | 9           |
| Yarinbab et al (31) | *                         | *                  | *                      | **                                                 | *                                                                                                                                                       | **                               | *                       | 9           |
| Demas et al (32)    | *                         | *                  | *                      | **                                                 | *                                                                                                                                                       | **                               | *                       | 9           |
| Bitew et al (33)    | *                         | *                  | *                      | **                                                 | *                                                                                                                                                       | **                               | *                       | 9           |
| Kidane et al (34)   | *                         | *                  | *                      | **                                                 | *                                                                                                                                                       | **                               | *                       | 9           |
| Melese et al (35)   | *                         | *                  | *                      | **                                                 | *                                                                                                                                                       | **                               | *                       | 9           |
| Gonie et al (36)    | *                         | *                  | *                      | *                                                  | *                                                                                                                                                       | *                                | *                       | 7           |
| Tayelign et al (37) | *                         | *                  | *                      | **                                                 | *                                                                                                                                                       | **                               | *                       | 8           |
| Dewana et al (38)   | *                         | *                  | *                      | **                                                 | *                                                                                                                                                       | **                               | *                       | 9           |
| Tesfaye et al (39)  | *                         | *                  | *                      | **                                                 | *                                                                                                                                                       | *                                | *                       | 8           |
| Mekonen et al (40)  | *                         | *                  | *                      | *                                                  | *                                                                                                                                                       | **                               | *                       | 8           |

|                        |   |   |   |    |   |    |   |   |
|------------------------|---|---|---|----|---|----|---|---|
| Amdemichael et al (41) | * | * | * | ** | * | *  | * | 8 |
| Tadesse et al (42)     | * | * | * | ** | * | ** | * | 9 |
| Assefa et al (43)      | * | * | * | *  | * | ** | * | 8 |
| Demis et al (44)       | * | * | * | ** | * | ** | * | 9 |
